## **GABA<sub>A</sub> $\alpha$ Subunit Control of Hyperactive Behavior in Developing Zebrafish**

Wayne Barnaby<sup>\*‡</sup>, Hanna E. Dorman Barclay<sup>‡</sup>, Akanksha Nagarkar<sup>‡</sup>, Matthew Perkins<sup>§</sup>,

Gregory Teicher<sup>†‡</sup>, Josef G. Trapani<sup>\*§</sup>, and Gerald B. Downes<sup>\*†‡\*\*</sup>

<sup>\*</sup>Neuroscience and Behavior Graduate Program, <sup>†</sup>Molecular and Cellular Biology Graduate Program, <sup>‡</sup>Biology Department, University of Massachusetts, Amherst, MA 01003

<sup>§</sup>Biology Department and Neuroscience Program, Amherst College, Amherst, MA 01002

<sup>\*\*</sup>Author for correspondence:

Gerald B. Downes

611 North Pleasant St., Morrill Science Center, Building 4 North

Amherst MA 01002

Email: [gbdownes@umass.edu](mailto:gbdownes@umass.edu)

Telephone: 413-545-1266

## 1 **ABSTRACT**

2           GABA<sub>A</sub> receptors mediate rapid responses to the neurotransmitter GABA and are  
3 robust regulators of the brain and spinal cord neural networks that control locomotor  
4 behaviors, such as walking and swimming. In developing zebrafish, gross pharmacological  
5 blockade of these receptors causes hyperactive swimming, which has been embraced as  
6 an epilepsy model. Although GABA<sub>A</sub> receptors are important to control locomotor behavior,  
7 the large number of subunits and homeostatic compensatory mechanisms have  
8 challenged efforts to determine subunit-selective roles. To address this issue, we mutated  
9 each of the eight zebrafish GABA<sub>A</sub>  $\alpha$  subunit genes individually and in pairs using a  
10 CRISPR-Cas9 somatic inactivation approach, then we examined the swimming behavior of  
11 the mutants at two developmental stages. We found that disrupting the expression of  
12 specific pairs of subunits resulted in different abnormalities in swimming behavior at the  
13 first development stage. Mutation of  $\alpha 4$  and  $\alpha 5$  selectively resulted in longer duration  
14 swimming episodes, mutations in  $\alpha 3$  and  $\alpha 4$  selectively caused excess, large-amplitude  
15 body flexions (C-bends), and mutation of  $\alpha 3$  and  $\alpha 5$  resulted in increases in both of these  
16 measures of hyperactivity. At the later stage of development, hyperactive phenotypes were  
17 nearly absent, suggesting that homeostatic compensation was able to overcome the  
18 disruption of even multiple subunits. Taken together, our results identify subunit-selective  
19 roles for GABA<sub>A</sub>  $\alpha 3$ ,  $\alpha 4$ , and  $\alpha 5$  in regulating locomotion. Given that these subunits exhibit  
20 spatially restricted expression patterns, these results provide a foundation to identify  
21 neurons and GABAergic networks that control discrete aspects of locomotor behavior.

## 22 INTRODUCTION

23 Neural networks in the vertebrate hindbrain and spinal cord rely upon a balance of  
24 excitatory and inhibitory neurotransmitter systems to orchestrate locomotion. Classically  
25 inhibitory, the neurotransmitter Gamma-AminoButyric Acid (GABA) is recognized as a key  
26 regulator of these circuits. GABA exerts its effects through two different classes of  
27 receptors, GABA<sub>A</sub> and GABA<sub>B</sub>. GABA<sub>B</sub> receptors are G-protein coupled receptors, while  
28 GABA<sub>A</sub> receptors are ligand-gated ion channels that generate rapid responses to GABA. In  
29 mammalian systems, GABA<sub>A</sub> receptors exhibit remarkable diversity, with each receptor  
30 thought to form a heteropentamer containing various combinations of 19 different subunits:  
31  $\alpha$ 1-6,  $\beta$ 1-3,  $\gamma$ 1-3,  $\delta$ ,  $\epsilon$ ,  $\pi$ ,  $\theta$  and  $\rho$ 1-3 (Sieghart and Sperk 2002; Simon et al. 2004; Chua  
32 and Chebib 2017). Each subunit is encoded by a discrete gene that is spatially and  
33 developmentally regulated to generate distinct, but sometimes overlapping, expression  
34 patterns (Laurie, Seeburg, et al. 1992; Laurie, Wisden, et al. 1992; Wisden et al. 1992).  
35 Several receptor subunits confer distinct biophysical and pharmacological properties,  
36 localize to synaptic or extrasynaptic sites, interact with specific cytoplasmic proteins, and  
37 contribute to different neuronal networks (Farrant and Nusser 2005; Jacob et al. 2008;  
38 Fritschy and Panzanelli 2014). While this incredible receptor heterogeneity is not fully  
39 understood, it could provide the opportunity to better understand, or even manipulate,  
40 distinct neuronal networks.

41 Several studies have used pharmacological blockade of GABA<sub>A</sub> receptors to reveal  
42 the central roles that these receptors play in regulating the initiation, rhythmicity, frequency  
43 and duration of locomotor network output from the spinal cord. These studies have been  
44 performed in a variety of vertebrate systems. For example, in neonatal mice, application of  
45 GABA<sub>A</sub> receptor antagonists to the spinal cord has been shown to cause inappropriate,  
46 bilateral discharges and regulate the onset and duration of rhythmic activity (Hinckley et al.

47 2005). In lamprey, application of GABA<sub>A</sub> receptor antagonists to spinal cord networks  
48 increased the frequency of locomotor bursts and disrupted lengthwise coordination  
49 (Schmitt et al. 2004). In *Xenopus* tadpoles, GABA<sub>A</sub> receptor mediated inhibition has been  
50 found to play both a tonic role in regulating the responsiveness to touch stimuli and a  
51 phasic role that stops swimming (Perrins et al. 2002; T. D. Lambert et al. 2004; Thomas D.  
52 Lambert et al. 2004). Although these and several other studies illustrate the importance of  
53 GABA<sub>A</sub> receptors in controlling locomotor networks, antagonists that block the majority of  
54 receptor isoforms were used, therefore these studies are less informative about the roles  
55 of specific subunits.

56 Genetic inactivation of GABA<sub>A</sub> receptor subunits in mice has had only limited  
57 success in identifying subunits required to mediate locomotor behavior. Although several  
58 of the 19 subunits exhibit robust expression in portions of the brain and spinal cord that  
59 mediate locomotion, few gene deletions have been found to cause abnormal locomotor  
60 behavior (Rudolph and Möhler 2004; Vicini and Ortinski 2004; Smith and Rudolph 2012).  
61 Ablation of some GABA<sub>A</sub> receptor genes has been shown to cause changes in the  
62 expression of other subunits, which suggests that homeostatic adaptations may explain at  
63 least some of the deletions that show no or only subtle locomotor phenotypes (Peng et al.  
64 2002; Kralic et al. 2006; Zeller et al. 2008; Panzanelli et al. 2011; Zhou et al. 2013; Fritschy  
65 and Panzanelli 2014).

66 Early larval-stage zebrafish, ~2-10 days post-fertilization, are a leading model for  
67 locomotor neural network analysis, and GABA<sub>A</sub> receptors regulate locomotion in this  
68 system. Bath application of GABA<sub>A</sub> receptor antagonists, such as pentylenetetrazole  
69 (PTZ), induces hyperactive swimming, meaning a dramatic increase which is also  
70 recognized as an epileptic seizure model (Baraban et al. 2005; Baxendale et al. 2012; Cho  
71 et al. 2020). Zebrafish harbor an array of GABA<sub>A</sub> subunits similar to mammals, with 23

72 identified subunits (Cocco et al. 2017; Monesson-Olson et al. 2018), however few mutants  
73 have been identified as important for locomotion. At 5 days post-fertilization (dpf), loss-of-  
74 function mutations in the broadly expressed  $\gamma 2$  subunit were reported to elicit hyperactive  
75 swimming that is behaviorally similar to PTZ exposure (Liao et al. 2019). At 7 dpf, loss-of-  
76 function mutations in  $\beta 3$ , which is also widely expressed, caused subtle increases in  
77 spontaneous swimming (Yang et al. 2019). Although loss-of-function mutations in  $\alpha 1$  were  
78 found to cause hyperactive swimming at 5 weeks post-fertilization, this behavior was not  
79 observed during larval stages (Samarut et al. 2018). Since GABA<sub>A</sub>  $\alpha$  subunits help form  
80 the GABA binding site, they are thought to be obligatory receptor components (Phulera et  
81 al. 2018; Zhu et al. 2018; Laverty et al. 2019; Masiulis et al. 2019). Thus, it is surprising  
82 that  $\alpha$  subunits have not been identified as important for regulation of embryonic or larval  
83 locomotor behavior. It is possible that, as in mammals, homeostatic compensation is able  
84 to conceal subtype-selective roles. Disrupting multiple subunits simultaneously could  
85 evade these mechanisms and reveal  $\alpha$  subunits that are required to regulate swimming  
86 behavior.

87         Here, we used an F0 CRISPR-Cas9, somatic mutation approach to screen the  
88 locomotor phenotypes of mutants in each of the eight  $\alpha$  subunits both individually and in  
89 combination at two different developmental stages: 48 and 96 hours post fertilization (hpf).  
90 We found that disrupting select pairs of  $\alpha$  subunits causes different types of hyperactive  
91 behavior at 48 hpf, which then decreased or was absent by 96 hpf. The absence of  
92 hyperactive behavior by 96 hpf was confirmed in F2 germline mutants and,  
93 correspondingly, electrophysiological recordings revealed brain activity indistinguishable  
94 from wild-type controls. These findings illustrate subunit selective-roles of GABA<sub>A</sub> receptor  
95  $\alpha$  subunits in regulating locomotor behavior which, given their restricted expression

96 patterns in larvae, serve as entry points to reveal cellular and circuit mechanisms that  
97 enable GABA to control locomotion.

98

## 99 **MATERIALS AND METHODS**

### 100 ***Zebrafish maintenance and breeding***

101 Adult zebrafish were maintained according to standard procedures, with the  
102 zebrafish facility on a 14-hour light/10-hour dark cycle. Embryos and larvae were kept at  
103 28.5°C in E3 media and staged according to morphological criteria (Kimmel et al. 1995;  
104 Parichy et al. 2009). All genetic manipulations and behavioral experiments were performed  
105 using a Tübingen (Tü) or Tüpfel longfin (TL) genetic background. All animal procedures for  
106 this study were approved by the University of Massachusetts Amherst or the Amherst  
107 College Institutional Animal Care and Use Committee (IACUC). Amherst College  
108 assurance number 3925-1 with the Office of Laboratory Animal Welfare.

109

### 110 ***Guide and Cas9 RNA preparation and microinjection***

111 Single guide RNAs were designed using the online tool, ChopChop v.2 (Labun et  
112 al. 2019) (Supplemental Table). ChopChop selects target sites for CRISPR-Cas9 using the  
113 NGG motif and ranks them based on efficiency (Montague et al. 2014). For each gene,  
114 two neighboring targets were selected with the high efficiency within exons that would  
115 disrupt all known splice-variants as assessed in ENSEMBL. CRISPR-Somatic Tissue  
116 Activity Tests were used to assess mutational efficiency for both targets of a selected  
117 gene, and the target that yielded better results was used. In some cases, neither of the  
118 initial targets was effectively mutated so two additional targets were selected.

119 Template DNA for gRNA synthesis was generated using the PCR based method  
120 described in (Shah et al. 2016). For *in vitro* transcription, we first generated an HPLC-

121 purified scaffolding primer (5'-  
122 GATCCGCACCGACTCGGTCCCACTTTTTCAAGTTGATAACGGACTAGCCTTATTTTAA  
123 CTTGCTATTTCTAGCTCTAAAAC-3'), which was common to all gRNA templateless PCR  
124 reactions. Next, for each target, we synthesized a unique primer sequence that contained  
125 a 5' T7 binding site, the 20 nucleotide specific target (Supplemental Table), and a 3' 20  
126 nucleotide site of scaffolding homology (5'- AATTAATACGACTCACTATA-[20 nucleotide  
127 Target Sequence]-GTTTTAGAGCTAGAAATAGC-3'). The PCR reaction contained: 0.4  
128 units of Phusion High-Fidelity DNA Polymerase (New England Biolabs, M0530S), 13.4  $\mu$ L  
129 ddH<sub>2</sub>O, 1  $\mu$ L target specific primer (10  $\mu$ M, IDT), 1  $\mu$ L scaffolding primer (10  $\mu$ M, IDT), 4  $\mu$ L  
130 5X Phusion HF, and 0.4  $\mu$ L dNTPs (10mM). Reactions were run in a thermocycler (BioRad)  
131 using the following conditions: 98°C for 30 seconds then 40 cycles of 98°C for 10 seconds,  
132 60°C for 10 seconds, 72°C for 15 seconds, which was followed by 72°C for 10 min. The  
133 PCR reaction was purified using the QIAGEN MinElute kit and used as a template for *in*  
134 *vitro* transcription reactions. Using 0.5-1 ug of purified PCR product, gRNAs were  
135 generated using the MEGAscript T7 Transcription kit (Thermofisher), purified via lithium  
136 chloride precipitation, and verified using a TAE denaturing gel. A nanodrop spectrometer  
137 was used to determine gRNA concentrations, which were then diluted to 200ng/ $\mu$ L in  
138 RNase free water.

139 Cas9 mRNA was synthesized similar to Shah *et al.*, 2016, but with the following  
140 changes. Purification of the linearized plasmid was performed using the E.Z.N.A. Cycle  
141 Pure Kit (Omega Bio-Tek), while purification of the Cas9 mRNA was by lithium chloride  
142 precipitation. Cas9 mRNA was diluted to 1200ng/ $\mu$ L in RNase free water.

143 Microinjections were performed at the 1-4 cell stage into the yolk of embryonic  
144 zebrafish. The injection cocktail contained: 2  $\mu$ L gRNA at 200ng/ $\mu$ L, 2  $\mu$ L Cas9 mRNA at  
145 1,200ng/ $\mu$ L, 1  $\mu$ L stop cassette (Gagnon et al. 2014) at 10  $\mu$ M, 2  $\mu$ L 0.05% Phenol Red, 4  $\mu$ L  
146 RNase free water. Approximately 500 pL was injected per embryo. Mock injections,

147 containing all cocktail ingredients except gRNAs, were not observed to have a significant  
148 effect compared to uninjected siblings, so uninjected sibling animals were used as the  
149 controls for most experiments.

150

### 151 ***Tyrosinase Pigmentation Analysis***

152 24 hours after injection, injected embryos were dechorionated using forceps and  
153 screened for morphological abnormalities using a dissecting scope (Zeiss).  
154 Morphologically abnormal fish were excluded from further analysis. At 48 hours and 96  
155 hours post-fertilization (hpf), larvae were anesthetized using 0.04% MS-222 (Tricaine) and  
156 pictures were taken using a Stemi 305 (Zeiss). All images were captured with the same  
157 dimensions (1280 x 960), resolution (72 x 72), lighting conditions and exposure times.  
158 Images were analyzed using a custom Python script (source code available upon request).  
159 Briefly, a threshold value was empirically selected based on its ability to most optimally  
160 segment pigmentation from other parts of the fish and the background across all images.  
161 The number of pixels greater than this threshold were summed and reported for each  
162 image. The same threshold value was applied to all images.

163

### 164 ***Behavioral Analysis***

165 Behavioral analysis was performed in a double-blind fashion. At 24hpf, injected  
166 embryos had their chorions removed and were subject to morphological screening. At  
167 48hpf, we examined escape responses to touch responses similar to as described in  
168 (Friedrich et al. 2012; McKeown et al. 2012). Briefly, light touch was applied to the head  
169 using a 3.22/0.16g of force von Frey filament. Swimming responses were captured using a  
170 high-speed digital camera (XStream 1024, IDT Vision) mounted to a 35 mm lens (Nikon) at  
171 a frame rate of 250 Hz. The head-to-tail angle for each frame of the response was



172 measured using custom software written in MATLAB (source code available upon  
173 request). C-bends were defined as any body flexion over 110 degrees, while escape  
174 response duration was defined as beginning the frame before initial movement was  
175 observed and ending at the last frame of detected movement (McKeown et al. 2012).

176

### 177 ***CRISPR-Somatic Tissue Activity Tests (STAT)***

178 CRISPR-STAT analysis was performed similar to as described by Carrington et al.  
179 2015 (Carrington et al. 2015). Primer pairs were designed to flank the targeting gRNA  
180 sites as determined in ChopChop span target sequences (Supplemental Table). Forward  
181 primers were tagged with a 6-FAM dye (Integrated DNA Technologies) which allowed for  
182 visualization in fragment analysis. Reverse primers were tagged with a PIG-tail adapter  
183 (5'-GTGTCTT-3') to reduce stutter (Blake et al., 2015). DNA was extracted from 6 embryos  
184 using the Extract-N-Amp Tissue PCR Kit (Millipore-Sigma) and amplified using Amplitaq  
185 Gold Taq Polymerase (ThermoFisher). PCR conditions followed those suggested by the  
186 taq polymerase manufacturer. DNA was diluted 1:20 in ddH<sub>2</sub>O and ran on an AB3730xl  
187 DNA Analyzer (Genewiz, South Plainfield, NJ). Results were analyzed using Geneious  
188 Software (Biomatters, Inc). Peaks were defined as signals exceeding 1,000 Relative  
189 Fluorescent Units (RFU). A gene target was considered successfully mutated if the peak  
190  $(\sum \frac{\# \text{ of } F0 \text{ peaks}}{\# \text{ of mock injected peaks}})$  ratio was 2 or above.

191

### 192 ***Gabra3 MUTANT LINES***

193 To generate *gabra3* mutant lines, CRISPR-Cas9 injected animals were raised to  
194 adulthood. CRISPR-STAT analysis was used to identify mosaic animals and these animals

195 were crossed to a wild-type strain (TLF). Two *gabra3* mutant alleles were identified in the  
196 F1 animals, a 7-base pair deletion (bp), *uma500*, and an 18-bp insertion, *uma501*.

197

### 198 ***Local Field Potential (LFP) Recording***

199 Local field potential (LFP) recordings were obtained from zebrafish larvae at 96 hpf  
200 using a technique similar to that in Liu and Baraban, 2019 . Prior to each recording, larvae  
201 were paralyzed by immersion for 30-60 minutes in  $\alpha$ -Bungarotoxin (125  $\mu$ M in  
202 dH20Invitrogen, Waltham MA) and were subsequently embedded dorsal side up in 2%  
203 low-melting-point agarose in extracellular solution (130 mM NaCl, 10 mM HEPES, 2 mM  
204 KCl, 2 mM CaCl<sub>2</sub>, 1 mM MgCl<sub>2</sub>, pH 7.8). In some experiments, the convulsant agent PTZ  
205 (10 mM) was applied to induce ictal-like brain activity. For each recording, a glass  
206 microelectrode (6-12 M $\Omega$ ) was filled with extracellular solution and inserted under visual  
207 guidance into the optic tectum. Local field potentials were recorded at 100X gain in current  
208 clamp mode using a Sutter Double IPA amplifier (Sutter Instruments, Novato CA). Voltage  
209 signals were low-pass filtered at 500 Hz-1 kHz and digitized at 5-10 kHz using SutterPatch  
210 Software (Sutter Instruments, Novato CA). Following acquisition, voltage traces were  
211 analyzed for ictal-like activity using NeuroMatic software (Rothman and Silver 2018) and  
212 the number of ictal-like events in the first 30 minutes of recording was assessed. For PTZ  
213 treated fish, one hour was allocated for wash-on and only the first 30 minutes of recording  
214 after this wash-on period was analyzed.

215

### 216 ***Statistics and Analysis***

217 To determine significant differences the following statistical tests and software were  
218 used. Welch's t-test and Ordinary 1-way ANOVA were used where appropriate. When t-  
219 tests were applied, F tests were used to compare variance. When ANOVAs were applied,

220 multiple comparison tests were used where test groups were compared against wildtype  
221 controls. A Dunnett test was used to correct against familywise error. Figures, plots and  
222 statistical testing were performed using Prism (GraphPad Software).

223

## 224 **RESULTS**

### 225 ***High-efficiency F0 somatic gene targeting using CRISPR-Cas9***

226 To identify GABA<sub>A</sub>  $\alpha$  subunits that control larval escape behavior we sought an  
227 approach to rapidly screen through different loss-of-function mutant combinations. Injecting  
228 zebrafish embryos with a cocktail containing Cas9-encoding and guide RNAs (gRNAs) has  
229 been shown to mutate target genes with enough efficiency to cause biallelic disruption  
230 (Shah et al. 2015; Varshney et al. 2015; Wu et al. 2018). Phenotypes can often be  
231 observed in these F0 somatic mutants, which can save a great deal of time compared to  
232 analysis of F2 germline homozygous mutants. A disadvantage of this approach is that F0  
233 somatic mutants are genetic mosaics, with different cells harboring different indels in the  
234 target gene, which may yield weaker phenotypes compared to those found in germline  
235 mutants. To confirm the efficiency of disrupting gene function using this approach, we  
236 targeted the tyrosinase (*tyr*) gene, similar to previous studies (Wu et al. 2018). Tyrosinase  
237 is essential for producing melanin and its disruption provides an easily observable loss of  
238 pigmentation. Phenylthiourea (PTU) is routinely used in zebrafish research to suppress  
239 melanin synthesis and it provides an effective method to evaluate CRISPR knockdown of  
240 *tyr*. We observed that injection of Cas9 and gRNAs targeting the *tyr* gene led to a  
241 substantial and persistent reduction in pigmentation in 48 and 96 hpf larvae, although not  
242 all melanin synthesis was eliminated compared to PTU treated controls (Supplementary  
243 Figure 1A, B). Correspondingly, PCR analysis of the somatic mutants through CRISPR-  
244 Somatic Tissue Activity Tests (STAT), indicated that a variety of mutations were induced in

245 the *tyr* gene (Supplementary Figure 1C). Taken together, these results confirm that F0  
246 somatic mutants provide a rapid and effective means to screen gene function.

247

### 248 ***GABA<sub>A</sub> Receptors Control Early Larval Swimming Behavior***

249 Although PTZ is known to elicit hyperactive swimming responses in fish older than 5  
250 dpf, its effect on earlier larval stages is less clear. We focused behavioral analysis on 48  
251 and 96 hpf larvae since these time points present the opportunity to analyze a more  
252 nascent zebrafish nervous system and the early stages of GABA<sub>A</sub> receptor control of  
253 locomotion. At 48 hpf, larvae are newly hatched and demonstrate burst swimming  
254 behavior, while 96 hpf larvae exhibit more mature swimming patterns (Brustein et al. 2003;  
255 McKeown et al. 2009; Roussel et al. 2020). Because acoustic and light responses are  
256 either absent or less robust at these early developmental stages, light touch was used to  
257 induce escape response swimming behavior. At both 48 and 96 hpf, larvae respond to light  
258 touch to the head with a well-characterized C-start, which consists of an initial C-shaped  
259 body bend to reorient the animal away from the touch stimulus, followed by lower-  
260 amplitude body undulations that propel it several body lengths away (Eaton et al. 1977;  
261 Granato et al. 1996; O'Malley et al. 1996; Eaton et al. 2001; Kohashi et al. 2012). After  
262 PTZ exposure, hyperactive behavior is observed, and two prominent aspects of swimming  
263 performance are altered similar to older fish: larvae performed longer duration escape  
264 responses and these responses are interspersed with multiple C-shaped body bends  
265 (Figure 1; Supplementary Movies 1 and 2). These results indicate that GABA<sub>A</sub> receptors  
266 are essential to regulate swimming behavior during escape responses in early larval  
267 zebrafish, as has been previously shown for later stages of development.

268

269

270 ***Mutation of pairs of  $\alpha$  subunits induces hyperactive behavior at 48 hpf***

271 To identify GABA<sub>A</sub>  $\alpha$  subunits that control locomotion, we generated F0 somatic  
272 mutations in each of the 8 subunits individually and in all pairwise combinations, then we  
273 analyzed touch-evoked behavior, focusing on escape response duration and body-bend  
274 amplitude (Figure 2A). Of the 36 conditions examined, no individually mutated  $\alpha$  subunit  
275 gave rise to abnormal response durations at 48 hpf, however mutating pairs  $\alpha 3/\alpha 5$  or  
276  $\alpha 4/\alpha 5$  resulted in increases in swimming times (Figure 2B). Sibling controls exhibited an  
277 average swimming duration of  $0.53 \pm 0.03$  seconds ( $n=256$ ). In contrast, larvae with  
278 mutations in  $\alpha 3/\alpha 5$  and  $\alpha 4/\alpha 5$  responded with an average of  $1.27 \pm 0.33$  seconds ( $n=18$ )  
279 and  $1.69 \pm 0.49$  seconds ( $n=18$ ), respectively (Figures 2C, 2D, Supplementary Movies, 3,  
280 4).

281 Mutations in  $\alpha 3$ ,  $\alpha 4$ , and  $\alpha 5$  also caused hyperactive increases in the number of  
282 C-shaped body bends at 48 hpf. Wild-type larvae exhibited an average of  $1.37 \pm 0.04$   
283 ( $n=383$ ) C-bends per escape response, while mutations in  $\alpha 3/\alpha 4$  and  $\alpha 3/\alpha 5$  performed an  
284 average of  $5.32 \pm 1.89$  ( $n=18$ ) and  $3.88 \pm 1.01$  ( $n=18$ ) C-bends per escape response,  
285 respectively (Figure 3A, B). Notably, mutations in pair  $\alpha 3/\alpha 4$  increased the number of C-  
286 bends per escape response without causing significantly longer swimming durations, while  
287 mutations in pair  $\alpha 4/\alpha 5$  caused an increase in swimming durations without a significant  
288 increase in C-bends. No mutant pairs without  $\alpha 3$  were found to increase the number of  
289 high-amplitude body bends. Similarly, no mutant pairs without  $\alpha 5$  were found to increase  
290 swimming durations. These observations suggest that  $\alpha 3$  might play a dominant role in  
291 controlling the number of C-bends during an escape response, while  $\alpha 5$  predominantly  
292 regulates swimming durations.

293

294

295 ***Hyperactive phenotypes at 48 hpf are absent or attenuated by 96 hpf***

296 The hyperactive phenotypes observed at 48 hpf were absent or greatly reduced by  
297 96 hpf. Mutations in pair  $\alpha 3/\alpha 5$  resulted in significantly longer duration swimming episodes  
298 at 48 hpf, however at 96 hpf the swimming behavior of these same animals was  
299 indistinguishable from controls (Figure 4A, B). Mutations in pair  $\alpha 4/\alpha 5$  did result in longer  
300 duration swimming responses at both 48 and 96 hpf, however, at the later time point, the  
301 difference compared to controls was far less (a difference of  $1.18 \pm 0.15$  (n=18) seconds at  
302 48 hpf and  $0.41 \pm 0.07$  (n=18) seconds at 96 hpf compared to controls). No other mutations  
303 caused increased swimming durations. Similarly, although mutations in pairs  $\alpha 3/\alpha 4$  or  
304  $\alpha 3/\alpha 5$  induced excess C-bends at 48 hpf, neither these nor any other mutations were  
305 found to cause significantly greater large-amplitude body flexions at 96 hpf (Figure 4C,D).

306

307  ***$\alpha 3$  F2 germline mutants confirm that hyperactive phenotypes at 48 hpf are reduced***  
308 ***by 96 hpf***

309 Previous studies have suggested that phenotypes observed in F0 somatic mutants  
310 can weaken during development, possibly due to the effects of mosaicism (ref). To  
311 address whether this mechanism could explain the reduction in hyperactive phenotypes at  
312 96 hpf, we generated  $\alpha 3$  germline mutants (Figure 5A). In line with  $\alpha 3$  selectively  
313 controlling high-amplitude body bends but not swimming duration,  $\alpha 3$  germline mutants  
314 demonstrated an increase in the number of C-bends without a significant increase in  
315 response times at 48 hpf (Figure 5B). The  $\alpha 3$  germline mutant phenotype was more robust  
316 than the  $\alpha 3$  F0 somatic phenotype, likely due to the mosaicism of somatic mutants. Similar  
317 to our observations using somatic mutants, at 96 hpf the number of C-bends were  
318 attenuated and not significantly different from sibling controls ( $p = 0.3879$ ). These data

319 indicate that the absent or weaker phenotypes observed in the F0 somatic mutants at 96  
320 hpf are not due to mosaicism.

321           Given that the behavior of  $\alpha 3$  mutants was indistinguishable from wild-type controls  
322 at 96 hpf, we next asked whether local field potential recordings from the larval brain  
323 (Figure 5C) would provide a more sensitive measure of phenotype abnormalities than our  
324 behavioral assay. Consistent with previous findings (Liu and Baraban, 2019), LFP  
325 recordings over a period of 30 minutes revealed frequent large and abnormal discharges  
326 of activity at 96 hpf when PTZ was applied. However,  $\alpha 3$  germline mutants and controls  
327 had neuronal activities that were indistinguishable from one another, consistent with their  
328 functionally normal swimming behaviors (Figure 5D).

329

## 330 **DISCUSSION**

331           In this study, we performed an F0 somatic mutant screen to identify GABA<sub>A</sub>  $\alpha$   
332 subunits that regulate hyperactive swimming during early larval stages of zebrafish  
333 development. We presented evidence that combinations of  $\alpha 3$ ,  $\alpha 4$  and  $\alpha 5$  have selective  
334 roles in mediating different aspects of hyperactive behavior at 48 hpf. F0 somatic  
335 mutations in pairs  $\alpha 3/\alpha 4$  significantly increased the number of high amplitude body bends,  
336 while mutations in pairs  $\alpha 3/\alpha 5$  significantly increased swimming duration, and mutation of  
337 pairs  $\alpha 3/\alpha 5$  caused significant increases in both parameters. We found that hyperactivity  
338 caused by somatic disruption of GABA<sub>A</sub>  $\alpha$  subunits is ostensibly reduced by 96 hpf, a  
339 result confirmed using germline  $\alpha 3$  mutants using both behavioral and electrophysiological  
340 assays. Taken together, these data lay a foundation to investigate how GABA<sub>A</sub> receptors  
341 establish and maintain control of escape behavior at neuronal and circuit levels.

342



343 ***GABA<sub>A</sub> Receptor Subunits Likely Control Escape Behavior Through Different***  
344 ***Cellular Mechanisms***

345       The GABA<sub>A</sub>  $\alpha$  subunits  $\alpha$ 3,  $\alpha$ 4, and  $\alpha$ 5 regulate escape behavior at 48 hpf, however  
346 the cellular mechanisms through which they exert their effects are not yet clear. The  
347 zebrafish hindbrain, in particular the Mauthner Cell and its homologs, play a central and  
348 well-studied role in C-starts, and these cells are regulated by GABA (Triller et al. 1997;  
349 Korn and Faber 2005; Burgess and Granato 2007; Kohashi et al. 2012; Roy and Ali 2014;  
350 Liu and Baraban 2019).  $\alpha$ 3,  $\alpha$ 4, and  $\alpha$ 5 are all expressed in discrete populations of  
351 hindbrain cells by 48 hpf, so it is possible their reduced expression dysregulates hindbrain  
352 circuits to generate hyperactive behavior (Monesson-Olson et al. 2018). Alternatively, each  
353 of these subunits is also expressed in distinct cell types in the spinal cord, so it is also  
354 possible that spinal cord GABA<sub>A</sub>  $\alpha$  subunit disruption elicits hyperactive behavior. In future  
355 studies it will be interesting to determine the relative contribution of the hindbrain versus  
356 the spinal cord in generating the abnormal behaviors caused by reduced GABA<sub>A</sub> receptor  
357 function.

358       Whether through the hindbrain or spinal cord,  $\alpha$ 3,  $\alpha$ 4, and  $\alpha$ 5 likely control escape  
359 behavior through different neurons or subcellular mechanisms. In both the hindbrain and  
360 spinal cord at 48 hpf,  $\alpha$ 3 and  $\alpha$ 5 are expressed in overlapping domains, raising the  
361 possibility they are expressed in at least some of the same cells (Monesson-Olson et al.  
362 2018). In both structures,  $\alpha$ 4 seems to be expressed in cells distinct from  $\alpha$ 3 and  $\alpha$ 5,  
363 therefore its effects could be mediated by different neurons.

364       Even when expressed in the same cells,  $\alpha$ 3,  $\alpha$ 4, and  $\alpha$ 5 are probably expressed in  
365 different subcellular domains. In mammalian neurons, GABA<sub>A</sub> receptors have been shown  
366 to cluster in either synaptic or extrasynaptic domains to mediate phasic or tonic inhibition  
367 (Farrant and Nusser 2005; Jacob et al. 2008; Fritschy and Panzanelli 2014).  $\alpha$ 3-containing



368 receptors are enriched at synapses, to mediate phasic inhibition, while  $\alpha 4$  and  $\alpha 5$ -  
369 containing receptors are predominantly extrasynaptic, to provide tonic inhibition. Although  
370 the subcellular localizations of these subunits have not been directly investigated in  
371 zebrafish, the high degree of amino acid sequence similarity suggests that their subcellular  
372 distributions are likely conserved, which would localize  $\alpha 3$  towards synapses while  $\alpha 4$  and  
373  $\alpha 5$  would be found in mainly extrasynaptic domains. High resolution expression analysis  
374 will be required to determine if this is the case.

375 We did not find significant effects in response to somatic mutation of  $\alpha 1$ ,  $\alpha 2a$ ,  $\alpha 2b$ ,  
376  $\alpha 6a$  or  $\alpha 6b$ , however these subunits cannot be entirely ruled out from playing regulatory  
377 roles in controlling zebrafish escape behavior. F0 somatic mutations reduce, but do not  
378 eliminate expression, so it is possible that further reducing the expression of these  
379 subunits could reveal locomotor phenotypes. Additionally, our screen focused on two  
380 behavioral parameters at two developmental stages. Examining additional developmental  
381 stages, responses to other sensory stimuli, or other parameters, such as body bend  
382 frequency or frequency variability, could reveal roles for these subunits in controlling  
383 escape behavior.

384

### 385 ***Zebrafish Exhibit Robust Homeostatic Mechanisms Across Development***

386 The hyperactive phenotypes observed at 48 hpf were all absent or greatly reduced  
387 by 96 hpf. This result was surprising since PTZ readily elicits hyperactive behavior at all  
388 time points after 48 hpf, demonstrating that GABA<sub>A</sub> receptors play critical roles in  
389 regulating locomotion across a wide variety of developmental stages. A likely explanation  
390 is that zebrafish employ robust homeostatic compensation. The mechanisms that underlie  
391 this compensation are probably multifaceted. The teleost lineage has undergone genome  
392 duplication such that there are many duplicated genes in zebrafish, including several

393 GABA<sub>A</sub> receptor subunits (Amores et al. 1998; Postlethwait et al. 1998; Monesson-Olson  
394 et al. 2018). The expression of homologous genes or simply genes with similar sequence  
395 motifs can be recruited through transcriptional adaptation, which is thought to be triggered  
396 by nonsense mediated decay (El-Brolosy et al. 2019). Mutations that cause frame-shifts  
397 and premature stop codons can cause nonsense mediated decay, therefore many of the  
398 mutations generated in this study almost certainly induced transcriptional adaptation. Pairs  
399 of  $\alpha$  subunits were mutated to uncover adaptations within the  $\alpha$  subunit subfamily, however  
400 transcriptional responses could involve other GABA<sub>A</sub> receptor subunits. At the network  
401 level, neurons could switch the neurotransmitter they release or entire circuits could be  
402 reconfigured to maintain excitation-inhibition balance as has been observed in developing  
403 frogs and some  $\alpha$  subunit knock-out mice, respectively (Schneider Gasser et al. 2007;  
404 Panzanelli et al. 2011). Our results here identify a narrow window between 48 and 96 hpf  
405 across which robust adaptations occur in developing zebrafish. The short time period,  
406 relatively small nervous system, ex-utero development, genetic resources, and high-  
407 resolution brain and spinal cord atlases make larval zebrafish an outstanding system to  
408 further investigate the homeostatic mechanisms activated by GABA<sub>A</sub> receptor mutation.

409

### 410 ***Zebrafish $\alpha 3$ Mutants as a Possible Epilepsy Model***

411 In addition to their roles in modulating locomotion, GABA<sub>A</sub> receptors are widely  
412 viewed as central factors in the development, progression, and treatment of epilepsy  
413 syndromes (Olsen and Avoli 1997; Treiman 2001; Cherubini 2012; Walker and Kullmann  
414 2012). Abnormalities in GABA<sub>A</sub> receptor inhibition are observed in genetic and acquired  
415 epilepsies, drugs that block these receptors, like PTZ, cause seizures, and drugs that  
416 enhance GABA<sub>A</sub> receptor inhibition are potent anticonvulsants. In zebrafish, PTZ  
417 application is an established seizure model, and loss-of-function mutations in  $\gamma 2$  and  $\beta 3$

418 cause larval hyperactive behavior and/or neuronal activity that model the epilepsies  
419 caused by mutations in their human orthologs (Baraban et al. 2005; Baxendale et al. 2012;  
420 Liao et al. 2019; Yang et al. 2019; Cho et al. 2020). Similarly, mutations in zebrafish  $\alpha 1$  cause  
421 light-triggered, hyperactive behavior in juvenile fish (older than ~5 weeks) that seems to  
422 model epilepsy caused by reduced  $\alpha 1$  function (Samarut et al. 2018). Here, we showed  
423 that mutation of  $\alpha 3$  causes hyperactive behavior in larval zebrafish. Human loss-of-function  
424 variants in  $\alpha 3$  cause a rare, severe epileptic encephalopathy, raising the possibility that  
425 zebrafish  $\alpha 3$  mutants at least partially model this disorder (Niturad et al. 2017). It is not yet  
426 clear whether the zebrafish hyperactive swimming observed at 48 hpf is due to brain or  
427 spinal cord mechanisms but, regardless, it is relatively simple to screen the phenotype  
428 caused by  $\alpha 3$  disruption. Given the proven effectiveness of larval zebrafish for high-  
429 throughput small molecule screens,  $\alpha 3$  mutants could be a new and useful resource to  
430 identify novel anti-epileptic drugs (Griffin et al. 2017; Lam and Peterson 2019; Griffin et al.  
431 2020; Patton et al. 2021 Jun 11).

432

### 433 **ACKNOWLEDGEMENTS**

434 The authors thank Abhay Mittal for developing kinematic analysis software; Saige  
435 Calkins, Caroline Martin, and Oshiomah Oyageshio for excellent fish care; and Marie  
436 Abate, Sean Doherty, Ana Dolan, and Chinemerem Nwokemodo-Ihejirika for technical  
437 assistance. We also thank the rest of the members of the Downes and Trapani labs, and  
438 the entire University of Massachusetts zebrafish community for thoughtful discussion.

439

### 440 **FUNDING**

441 This work was funded by the National Science Foundation (IOS 1456866) to GBD and  
442 JGT.

443 **FIGURE LEGENDS**

444 **Figure 1. Pentylentetrazole (PTZ) exposure induces hyperactive swimming in early**  
445 **larval zebrafish.** PTZ is a potent GABA<sub>A</sub> receptor antagonist. Bath application of 10 mM  
446 PTZ to both 48 and 96 hpf zebrafish caused an increase in (A) swim duration shown in  
447 seconds and (B) C-bends, defined as large-amplitude body bends over 110°. Box plots are  
448 representing the 25% and 75% quartiles with the median represented by a horizontal black  
449 line and the mean represented by a black plus sign within the box. Tukey's whiskers were  
450 used.  $n=20$  and 39 for wild type and PTZ treated larvae, respectively, \*\* $P<0.01$ ,  
451 \*\*\* $P<0.001$ , \*\*\*\* $P<0.0001$  using unpaired Welch's t-tests.

452

453 **Figure 2. An F0 somatic mutation screen of GABA<sub>A</sub> receptor  $\alpha$  subunits identifies**  
454 **mutant combinations that show increased swimming durations at 48 hpf.** (A)  
455 Overview of the GABA<sub>A</sub>R  $\alpha$  subunit screen. Different colored boxes represent different  
456 aspects of the screen. (B) Heat matrix of the 36 single and double F0 somatic mutant  
457 conditions indicating mean startle response durations. The heatbar (*right*) indicates the  
458 average swim length. The box at lower right shows mock or uninjected controls. Ordinary  
459 one-way ANOVA revealed significant differences in swimming durations according to  
460 knock-down target, (N=995 larvae total, 612 mutants with 13-26 larvae per condition, 383  
461 wild-type siblings;  $F(36,958) = 5.316$ ,  $p<0.0001$ ). A Dunnett's post-hoc test revealed  
462 significant pairwise differences between  $\alpha 3/\alpha 5$  compared to wild-type and  $\alpha 4/\alpha 5$  compared  
463 to wild-type (*white asterisks*), with those conditions exhibiting average swim durations of  
464  $1.27 \pm 0.33$  seconds ( $n=18$ ) and  $1.69 \pm 0.49$  seconds, respectively. (C) Boxplots of  $\alpha 3/\alpha 5$   
465 and  $\alpha 4/\alpha 5$  somatic mutant swimming durations show the increased swimming durations  
466 compared to controls. \*\*\* $P<0.001$ , \*\*\*\* $P<0.0001$  using Dunnett's multiple comparison test.

467 (D) Traces of representative escape responses for wild-type,  $\alpha 3/\alpha 5$  and  $\alpha 4/\alpha 5$  somatic  
468 mutants. The color spectrum of each trace indicates the beginning (*red*) and end (*blue*) of  
469 the response, and *white circles* represent the location of C bends. The videos used to  
470 generate these traces are provided in the Supplementary Data.

471

472 **Figure 3. Somatic mutation of pairs  $\alpha 3/\alpha 4$  or  $\alpha 3/\alpha 5$  causes an increased number of**  
473 **large-amplitude body bends at 48 hpf.** (A) Heat matrix of the  $\alpha$  subunit single and  
474 double somatic mutant conditions indicating mean numbers of C-bends per response. The  
475 heatbar (*right*) indicates the average swim length. The box at lower right shows mock or  
476 uninjected controls. Ordinary one-way ANOVA revealed significant differences in large-  
477 amplitude body bends according to knock-down target, ( $F(36, 834)=4.221, p<0.0001$ ). A  
478 Dunnett's post-hoc test revealed significant pairwise differences between  $\alpha 3/\alpha 4$  compared  
479 to wild-type and  $\alpha 3/\alpha 5$  compared to wild-type (*white asterisks*), with those conditions  
480 exhibiting average C-bend per response of 5.32 and 3.88, respectively, compared to 1.37.  
481 (B) Boxplots of  $\alpha 3/\alpha 4$  and  $\alpha 3/\alpha 5$  somatic mutant C-bends show the increased number of  
482 large amplitude body bends per swimming episode compared to sibling controls.  
483 \*\*\* $P<0.001$ , \*\*\*\* $P<0.0001$  using Dunnett's multiple comparison test. (C) Traces of  
484 representative escape responses for wild-type,  $\alpha 3/\alpha 4$  and  $\alpha 3/\alpha 5$ . The color spectrum of  
485 each trace indicates the beginning (*red*) and end (*blue*) of the response, and *white circles*  
486 represent the location of C bends. The videos used to generate these traces are provided  
487 in the Supplementary Data.

488

489

490 **Figure 4. Only  $\alpha 4/\alpha 5$  somatic mutants continue to exhibit a hyperactive phenotype at**  
491 **96 hpf.** (A) Heat matrix of the single and double F0 somatic mutant conditions showing  
492 evoked swimming response durations at 96 hpf. The heatbar (*right*) indicates the average  
493 swim length. The box at lower right shows mock or uninjected controls. Ordinary one-way  
494 ANOVA revealed a significant difference in swimming duration dependent upon knock-  
495 down target ( $F(36,754) = 2.914, p < 0.0001$ ). A Dunnett's post-hoc test revealed only a  
496 significant pairwise difference between  $\alpha 4/\alpha 5$  (*white asterisk*) and wild-type. (B) A boxplot  
497 of  $\alpha 3/\alpha 5$ ,  $\alpha 4/\alpha 5$  mutant pairs and controls. Both mutant conditions showed increased  
498 swimming durations at 48 hpf, however only the  $\alpha 4/\alpha 5$  pair was statistically significant at  
499 96 hpf. Although significant, the  $\alpha 4/\alpha 5$  swimming duration is reduced compared to 48 hpf.  
500 **\*\* $P < 0.01$**  using Dunnett's multiple comparison test. (C) Heat matrix of C bends at 96 hpf.  
501 No significant differences were detected. (D) Box plots show that conditions that  
502 demonstrated increased C bends at 48 hpf were not significantly elevated at 96 hpf.

503

504 **Figure 5.  $\alpha 3$  F2 germline mutants confirm the  $\alpha 3$  G0 somatic mutant phenotype.**

505 (A) A schematic of the  $\alpha 3$  protein is shown based upon (Macdonald et al. 2010). The four  
506 transmembrane domains are indicated, along with the location of the zebrafish (*Danio*  
507 *rerio*) and human (*Homo sapiens*)  $\alpha 3$  mutations. (B) Box plots for  $\alpha 3$  trans-heterozygous  
508 mutants and siblings swimming duration in seconds (*left*) and C-bends per response (*right*)  
509 at both 48 and 96 hpf. Unpaired Student's t-test indicated that  $\alpha 3$  mutants exhibit  
510 significantly more C-bends at 48 hpf but not at 96 hpf **\*\*\*\*= $p < 0.0001$** .  $\alpha 3$  mutant swimming  
511 durations were not significantly greater than sibling controls at either time point. (C)  
512 Schematic of LFP recording setup from a 96 hpf larvae. (D) LFP traces (*left*) from wild-type

513 (n=3), siblings (n=7), PTZ treated wild-type (n=3),  $\alpha 3$  heterozygotes (n=6), and  $\alpha 3$  trans-  
514 heterozygous mutants (n=3). Ictal-like activity was only detected in PTZ treated fish  
515 compared to wild-type (*right*), as revealed by ordinary one-way ANOVA with Dunnett's  
516 post-hoc test, \*\*\*\*= $p < 0.0001$ .

517

518 **Supplementary Figure 1. CRISPR-Cas 9 targeting of *tyr* confirms high-efficiency**

519 **gene targeting.** (A) Wild-type uninjected (*left*) and fish in which *tyr* gRNA and Cas9

520 encoding RNA were injected (*right*) at 48 (*top*) and 96 hpf (*bottom*). The fish in which the

521 *tyr* gene was targeted show reductions in melanophores. (B) Bar graph showing a pixel

522 density analysis of uninjected (n=21), *tyr* CRISPR-injected (n=36), or PTU-treated larvae

523 (n=20). *tyr* CRISPR-injected larvae show reduced pixel density at both developmental

524 ages, indicating effective gene knock-down. Each group measured against pixels detected

525 above an arbitrary threshold determined *a priori*. Ordinary One-Way ANOVA was used

526 \*\*\*\*= $p < 0.0001$ . (C) Fragment Analysis of WT (*top*) or *tyr* injected embryos (*bottom*). While

527 PCR analysis of wild-type larvae reveals a single peak of ~278 base pairs, PCR analysis

528 across this same region of *tyr*-CRISPR-injected larvae shows several peaks, indicating the

529 presence of indels in the target region.

530

531 **Supplementary Movie 1. Representative movie of a wild-type larva touch response**

532 **at 48 hpf.** The video was recorded at 250 frames/second (1.18 seconds in length) and was

533 used to generate the trajectory trace shown in Figure 2D. Wild-type larvae respond to

534 touch by performing a C-bend followed by rhythmic, smaller amplitude body bends to

535 propel the animal away from the touch stimulus.



536 **Supplementary Movie 2. Representative movie of an  $\alpha 3/\alpha 5$  G0 somatic mutant at 48**  
537 **hpf.** The video was recorded at 250 frames/second (5.48 seconds in length) and was used  
538 to generate the trajectory trace shown in Figure 2D.  $\alpha 3/\alpha 5$  mutants exhibit both increased  
539 swimming durations and C-bends per response.

540  
541 **Supplementary Movie 3. Representative movie of an  $\alpha 4/\alpha 5$  G0 somatic mutant at 48**  
542 **hpf.** The video was recorded at 250 frames/second (3.93 seconds in length) and was used  
543 to generate the trajectory trace shown in Figure 2D.  $\alpha 4/\alpha 5$  mutants exhibit increased  
544 swimming durations without a statistically significant increase in the number of C-bends.

545  
546 **Supplementary Movie 4. Representative movie of an  $\alpha 3/\alpha 4$  G0 somatic mutant at 48**  
547 **hpf.** The video was recorded at 250 frames/second (0.99 seconds in length) and was used  
548 to generate the trajectory trace shown in Figure 3C.  $\alpha 3/\alpha 4$  mutants exhibit increased C-  
549 bends without a statistically significant increase in length of response durations.

550

## 551 REFERENCES

- 552 Amores A, Force A, Yan YL, Joly L, Amemiya C, Fritz A, Ho RK, Langeland J, Prince V,  
553 Wang YL, et al. 1998. Zebrafish hox clusters and vertebrate genome evolution.  
554 *Science*. 282(5394):1711–1714. doi:10.1126/science.282.5394.1711.
- 555 Baraban SC, Taylor MR, Castro PA, Baier H. 2005. Pentylentetrazole induced changes  
556 in zebrafish behavior, neural activity and c-fos expression. *Neuroscience*.  
557 131(3):759–768. doi:10.1016/j.neuroscience.2004.11.031.
- 558 Baxendale S, Holdsworth CJ, Meza Santoscoy PL, Harrison MRM, Fox J, Parkin CA,  
559 Ingham PW, Cunliffe VT. 2012. Identification of compounds with anti-convulsant  
560 properties in a zebrafish model of epileptic seizures. *Dis Model Mech*. 5(6):773–  
561 784. doi:10.1242/dmm.010090.



- 562 Brusteïn E, Saint-Amant L, Buss RR, Chong M, McDearmid JR, Drapeau P. 2003.  
563 Steps during the development of the zebrafish locomotor network. *J*  
564 *Physiol-Paris*. 97(1):77–86. doi:10.1016/j.jphysparis.2003.10.009.
- 565 Burgess HA, Granato M. 2007. Sensorimotor gating in larval zebrafish. *J Neurosci Off J*  
566 *Soc Neurosci*. 27(18):4984–4994. doi:10.1523/JNEUROSCI.0615-07.2007.
- 567 Carrington B, Varshney GK, Burgess SM, Sood R. 2015. CRISPR-STAT: an easy and  
568 reliable PCR-based method to evaluate target-specific sgRNA activity. *Nucleic Acids*  
569 *Res*. 43(22):e157. doi:10.1093/nar/gkv802.
- 570 Cherubini E. 2012. Phasic GABAA-Mediated Inhibition. In: Noebels JL, Avoli M,  
571 Rogawski MA, Olsen RW, Delgado-Escueta AV, editors. *Jasper’s Basic*  
572 *Mechanisms of the Epilepsies*. 4th ed. Bethesda (MD)
- 573 Cho S-J, Park E, Baker A, Reid AY. 2020. Age Bias in Zebrafish Models of Epilepsy:  
574 What Can We Learn From Old Fish? *Front Cell Dev Biol*. 8:573303.  
575 doi:10.3389/fcell.2020.573303.
- 576 Chua HC, Chebib M. 2017. GABAA Receptors and the Diversity in their Structure and  
577 Pharmacology. *Adv Pharmacol San Diego Calif*. 79:1–34.  
578 doi:10.1016/bs.apha.2017.03.003.
- 579 Cocco A, Rönnerberg AMC, Jin Z, André GI, Vossen LE, Bhandage AK, Thörnqvist P-O,  
580 Birnir B, Winberg S. 2017. Characterization of the  $\gamma$ -aminobutyric acid signaling  
581 system in the zebrafish (*Danio rerio* Hamilton) central nervous system by reverse  
582 transcription-quantitative polymerase chain reaction. *Neuroscience*. 343:300–321.  
583 doi:10.1016/j.neuroscience.2016.07.018.
- 584 Eaton RC, Bombardieri RA, Meyer DL. 1977. The Mauthner-initiated startle response in  
585 teleost fish. *J Exp Biol*. 66(1):65–81. doi:10.1242/jeb.66.1.65.
- 586 Eaton RC, Lee RKK, Foreman MB. 2001. The Mauthner cell and other identified neurons  
587 of the brainstem escape network of fish. *Prog Neurobiol*. 63(4):467–485.  
588 doi:10.1016/S0301-0082(00)00047-2.
- 589 El-Brolosy MA, Kontarakis Z, Rossi A, Kuenne C, Günther S, Fukuda N, Kikhi K, Boezio  
590 GLM, Takacs CM, Lai S-L, et al. 2019. Genetic compensation triggered by mutant  
591 mRNA degradation. *Nature*. 568(7751):193–197. doi:10.1038/s41586-019-1064-z.
- 592 Farrant M, Nusser Z. 2005. Variations on an inhibitory theme: phasic and tonic  
593 activation of GABA(A) receptors. *Nat Rev Neurosci*. 6(3):215–229.  
594 doi:10.1038/nrn1625.
- 595 Friedrich T, Lambert AM, Masino MA, Downes GB. 2012. Mutation of zebrafish  
596 dihydrolipoamide branched-chain transacylase E2 results in motor dysfunction and  
597 models maple syrup urine disease. *Dis Model Mech*. 5(2):248–258.  
598 doi:10.1242/dmm.008383.

- 599 Fritschy J-M, Panzanelli P. 2014. GABAA receptors and plasticity of inhibitory  
600 neurotransmission in the central nervous system. *Eur J Neurosci.* 39(11):1845–  
601 1865. doi:10.1111/ejn.12534.
- 602 Gagnon JA, Valen E, Thyme SB, Huang P, Akhmetova L, Akhmetova L, Pauli A,  
603 Montague TG, Zimmerman S, Richter C, et al. 2014. Efficient mutagenesis by Cas9  
604 protein-mediated oligonucleotide insertion and large-scale assessment of single-guide  
605 RNAs. *PloS One.* 9(5):e98186. doi:10.1371/journal.pone.0098186.
- 606 Granato M, van Eeden FJ, Schach U, Trowe T, Brand M, Furutani-Seiki M, Haffter P,  
607 Hammerschmidt M, Heisenberg CP, Jiang YJ, et al. 1996. Genes controlling and  
608 mediating locomotion behavior of the zebrafish embryo and larva. *Dev Camb Engl.*  
609 123:399–413.
- 610 Griffin A, Anvar M, Hamling K, Baraban SC. 2020. Phenotype-Based Screening of  
611 Synthetic Cannabinoids in a Dravet Syndrome Zebrafish Model. *Front Pharmacol.*  
612 11:464. doi:10.3389/fphar.2020.00464.
- 613 Griffin A, Hamling KR, Knupp K, Hong S, Lee LP, Baraban SC. 2017. Clemizole and  
614 modulators of serotonin signalling suppress seizures in Dravet syndrome. *Brain J*  
615 *Neurol.* 140(3):669–683. doi:10.1093/brain/aww342.
- 616 Hinckley C, Seebach B, Ziskind-Conhaim L. 2005. Distinct roles of glycinergic and  
617 GABAergic inhibition in coordinating locomotor-like rhythms in the neonatal mouse  
618 spinal cord. *Neuroscience.* 131(3):745–758.  
619 doi:10.1016/j.neuroscience.2004.11.034.
- 620 Jacob TC, Moss SJ, Jurd R. 2008. GABA(A) receptor trafficking and its role in the dynamic  
621 modulation of neuronal inhibition. *Nat Rev Neurosci.* 9(5):331–343.  
622 doi:10.1038/nrn2370.
- 623 Kimmel CB, Ballard WW, Kimmel SR, Ullmann B, Schilling TF. 1995. Stages of  
624 embryonic development of the zebrafish. *Dev Dyn Off Publ Am Assoc Anat.*  
625 203(3):253–310. doi:10.1002/aja.1002030302.
- 626 Kohashi T, Nakata N, Oda Y. 2012. Effective Sensory Modality Activating an Escape  
627 Triggering Neuron Switches during Early Development in Zebrafish. *J Neurosci.*  
628 32(17):5810–5820.
- 629 Korn H, Faber DS. 2005. The Mauthner cell half a century later: a neurobiological model  
630 for decision-making? *Neuron.* 47(1):13–28. doi:10.1016/j.neuron.2005.05.019.
- 631 Kralic JE, Sidler C, Parpan F, Homanics GE, Morrow AL, Fritschy J-M. 2006.  
632 Compensatory alteration of inhibitory synaptic circuits in cerebellum and thalamus  
633 of gamma-aminobutyric acid type A receptor alpha1 subunit knockout mice. *J Comp*  
634 *Neurol.* 495(4):408–421. doi:10.1002/cne.20866.
- 635 Labun K, Montague TG, Krause M, Torres Cleuren YN, Tjeldnes H, Valen E. 2019.  
636 CHOPCHOP v3: expanding the CRISPR web toolbox beyond genome editing. *Nucleic*  
637 *Acids Res.* 47(W1):W171–W174. doi:10.1093/nar/gkz365.

- 638 Lam P-Y, Peterson RT. 2019. Developing zebrafish disease models for in vivo small  
639 molecule screens. *Curr Opin Chem Biol.* 50:37–44. doi:10.1016/j.cbpa.2019.02.005.
- 640 Lambert Thomas D., Howard J, Plant A, Soffe S, Roberts A. 2004. Mechanisms and  
641 significance of reduced activity and responsiveness in resting frog tadpoles. *J Exp Biol.*  
642 207(Pt 7):1113–1125. doi:10.1242/jeb.00866.
- 643 Lambert T. D., Li W-C, Soffe SR, Roberts A. 2004. Brainstem control of activity and  
644 responsiveness in resting frog tadpoles: tonic inhibition. *J Comp Physiol A*  
645 *Neuroethol Sens Neural Behav Physiol.* 190(4):331–342. doi:10.1007/s00359-004-  
646 0505-8.
- 647 Laurie DJ, Seeburg PH, Wisden W. 1992. The distribution of 13 GABAA receptor  
648 subunit mRNAs in the rat brain. II. Olfactory bulb and cerebellum. *J Neurosci Off J*  
649 *Soc Neurosci.* 12(3):1063–1076.
- 650 Laurie DJ, Wisden W, Seeburg PH. 1992. The distribution of thirteen GABAA receptor  
651 subunit mRNAs in the rat brain. III. Embryonic and postnatal development. *J Neurosci*  
652 *Off J Soc Neurosci.* 12(11):4151–4172.
- 653 Laverty D, Desai R, Uchański T, Masiulis S, Stec WJ, Malinauskas T, Zivanov J, Pardon E,  
654 Steyaert J, Miller KW, et al. 2019. Cryo-EM structure of the human  $\alpha 1\beta 3\gamma 2$  GABA A  
655 receptor in a lipid bilayer. *Nature.* 565(7740):516–520. doi:10.1038/s41586-018-  
656 0833-4.
- 657 Liao M, Kundap U, Rosch RE, Burrows DRW, Meyer MP, Ouled Amar Bencheikh B,  
658 Cossette P, Samarut É. 2019. Targeted knockout of GABA-A receptor gamma 2  
659 subunit provokes transient light-induced reflex seizures in zebrafish larvae. *Dis Model*  
660 *Mech.* 12(11). doi:10.1242/dmm.040782.
- 661 Liu J, Baraban SC. 2019. Network Properties Revealed during Multi-Scale Calcium  
662 Imaging of Seizure Activity in Zebrafish. *eNeuro.* 6(1). doi:10.1523/ENEURO.0041-  
663 19.2019.
- 664 Macdonald RL, Kang J-Q, Gallagher MJ. 2010. Mutations in GABAA receptor subunits  
665 associated with genetic epilepsies. *J Physiol.* 588(11):1861–1869.  
666 doi:10.1113/jphysiol.2010.186999.
- 667 Masiulis S, Desai R, Uchański T, Serna Martin I, Laverty D, Karia D, Malinauskas T,  
668 Zivanov J, Pardon E, Kotecha A, et al. 2019. GABAA receptor signalling mechanisms  
669 revealed by structural pharmacology. *Nature.* 565(7740):454–459. doi:10.1038/s41586-  
670 018-0832-5.
- 671 McKeown KA, Downes GB, Hutson LD. 2009. Modular laboratory exercises to analyze  
672 the development of zebrafish motor behavior. *Zebrafish.* 6(2):179–185.  
673 doi:10.1089/zeb.2008.0564.
- 674 McKeown KA, Moreno R, Hall VL, Ribera AB, Downes GB. 2012. Disruption of *Eaat2b*, a  
675 glutamate transporter, results in abnormal motor behaviors in developing zebrafish.  
676 *Dev Biol.* 362(2):162–171. doi:10.1016/j.ydbio.2011.11.001.

- 677 Monesson-Olson B, McClain JJ, Case AE, Dorman HE, Turkewitz DR, Steiner AB,  
678 Downes GB. 2018. Expression of the eight GABAA receptor  $\alpha$  subunits in the  
679 developing zebrafish central nervous system. *PLoS One*. 13(4):e0196083.  
680 doi:10.1371/journal.pone.0196083.
- 681 Montague TG, Cruz JM, Gagnon JA, Church GM, Valen E. 2014. CHOPCHOP: a  
682 CRISPR/Cas9 and TALEN web tool for genome editing. *Nucleic Acids Res*. 42(Web  
683 Server issue):W401-407. doi:10.1093/nar/gku410.
- 684 Niturad CE, Lev D, Kalscheuer VM, Charzewska A, Schubert J, Lerman-Sagie T, Kroes  
685 HY, Oegema R, Traverso M, Specchio N, et al. 2017. Rare GABRA3 variants are  
686 associated with epileptic seizures, encephalopathy and dysmorphic features. *Brain J*  
687 *Neurol*. 140(11):2879–2894. doi:10.1093/brain/awx236.
- 688 Olsen RW, Avoli M. 1997. GABA and epileptogenesis. *Epilepsia*. 38(4):399–407.  
689 doi:10.1111/j.1528-1157.1997.tb01728.x.
- 690 O'Malley DM, Kao Y-H, Fetcho JR. 1996. Imaging the Functional Organization of Zebrafish  
691 Hindbrain Segments during Escape Behaviors. *Neuron*. 17(6):1145–1155.  
692 doi:10.1016/S0896-6273(00)80246-9.
- 693 Panzanelli P, Gunn BG, Schlatter MC, Benke D, Tyagarajan SK, Scheiffele P, Belelli D,  
694 Lambert JJ, Rudolph U, Fritschy J-M. 2011. Distinct mechanisms regulate GABAA  
695 receptor and gephyrin clustering at perisomatic and axo-axonic synapses on CA1  
696 pyramidal cells. *J Physiol*. 589(Pt 20):4959–4980. doi:10.1113/jphysiol.2011.216028.
- 697 Parichy DM, Elizondo MR, Mills MG, Gordon TN, Engeszer RE. 2009. Normal table of  
698 postembryonic zebrafish development: staging by externally visible anatomy of the  
699 living fish. *Dev Dyn Off Publ Am Assoc Anat*. 238(12):2975–3015.  
700 doi:10.1002/dvdy.22113.
- 701 Patton EE, Zon LI, Langenau DM. 2021 Jun 11. Zebrafish disease models in drug  
702 discovery: from preclinical modelling to clinical trials. *Nat Rev Drug Discov*.  
703 doi:10.1038/s41573-021-00210-8.
- 704 Peng Z, Hauer B, Mihalek RM, Homanics GE, Sieghart W, Olsen RW, Houser CR. 2002.  
705 GABA(A) receptor changes in delta subunit-deficient mice: altered expression of  
706 alpha4 and gamma2 subunits in the forebrain. *J Comp Neurol*. 446(2):179–197.  
707 doi:10.1002/cne.10210.
- 708 Perrins R, Walford A, Roberts A. 2002. Sensory activation and role of inhibitory  
709 reticulospinal neurons that stop swimming in hatchling frog tadpoles. *J Neurosci Off*  
710 *J Soc Neurosci*. 22(10):4229–4240. doi:20026404.
- 711 Phulera S, Zhu H, Yu J, Claxton DP, Yoder N, Yoshioka C, Gouaux E. 2018. Cryo-EM  
712 structure of the benzodiazepine-sensitive  $\alpha 1\beta 1\gamma 2\delta$  tri-heteromeric GABAA receptor  
713 in complex with GABA. Swartz KJ, Aldrich R, editors. *eLife*. 7:e39383.  
714 doi:10.7554/eLife.39383.

- 715 Postlethwait JH, Yan YL, Gates MA, Horne S, Amores A, Brownlie A, Donovan A, Egan  
716 ES, Force A, Gong Z, et al. 1998. Vertebrate genome evolution and the zebrafish  
717 gene map. *Nat Genet.* 18(4):345–349. doi:10.1038/ng0498-345.
- 718 Rothman JS, Silver RA. 2018. NeuroMatic: An Integrated Open-Source Software Toolkit  
719 for Acquisition, Analysis and Simulation of Electrophysiological Data. *Front*  
720 *Neuroinformatics.* 12:14. doi:10.3389/fninf.2018.00014.
- 721 Roussel Y, Paradis M, Gaudreau SF, Lindsey BW, Bui TV. 2020. Spatiotemporal  
722 Transition in the Role of Synaptic Inhibition to the Tail Beat Rhythm of Developing  
723 Larval Zebrafish. *eNeuro.* 7(1). doi:10.1523/ENEURO.0508-18.2020.
- 724 Roy B, Ali DW. 2014. Multiple types of GABAA responses identified from zebrafish  
725 Mauthner cells. *Neuroreport.* 25(15):1232–1236.  
726 doi:10.1097/WNR.000000000000258.
- 727 Rudolph U, Möhler H. 2004. Analysis of GABAA receptor function and dissection of the  
728 pharmacology of benzodiazepines and general anesthetics through mouse genetics.  
729 *Annu Rev Pharmacol Toxicol.* 44:475–498.  
730 doi:10.1146/annurev.pharmtox.44.101802.121429.
- 731 Samarut É, Swaminathan A, Riché R, Liao M, Hassan-Abdi R, Renault S, Allard M, Dufour  
732 L, Cossette P, Soussi-Yanicostas N, et al. 2018.  $\gamma$ -Aminobutyric acid receptor alpha  
733 1 subunit loss of function causes genetic generalized epilepsy by impairing inhibitory  
734 network neurodevelopment. *Epilepsia.* 59(11):2061–2074. doi:10.1111/epi.14576.
- 735 Schmitt DE, Hill RH, Grillner S. 2004. The spinal GABAergic system is a strong  
736 modulator of burst frequency in the lamprey locomotor network. *J Neurophysiol.*  
737 92(4):2357–2367. doi:10.1152/jn.00233.2004.
- 738 Schneider Gasser EM, Duveau V, Prenosil GA, Fritschy J-M. 2007. Reorganization of  
739 GABAergic circuits maintains GABAA receptor-mediated transmission onto CA1  
740 interneurons in alpha1-subunit-null mice. *Eur J Neurosci.* 25(11):3287–3304.  
741 doi:10.1111/j.1460-9568.2007.05558.x.
- 742 Shah AN, Davey CF, Whitebirch AC, Miller AC, Moens CB. 2015. Rapid reverse genetic  
743 screening using CRISPR in zebrafish. *Nat Methods.* 12(6):535–540.  
744 doi:10.1038/nmeth.3360.
- 745 Shah AN, Moens CB, Miller AC. 2016. Targeted candidate gene screens using  
746 CRISPR/Cas9 technology. *Methods Cell Biol.* 135:89–106.  
747 doi:10.1016/bs.mcb.2016.01.008.
- 748 Sieghart W, Sperk G. 2002. Subunit composition, distribution and function of GABA(A)  
749 receptor subtypes. *Curr Top Med Chem.* 2(8):795–816.  
750 doi:10.2174/1568026023393507.
- 751 Simon J, Wakimoto H, Fujita N, Lalande M, Barnard EA. 2004. Analysis of the set of  
752 GABA(A) receptor genes in the human genome. *J Biol Chem.* 279(40):41422–41435.  
753 doi:10.1074/jbc.M401354200.



- 754 Smith KS, Rudolph U. 2012. Anxiety and depression: mouse genetics and  
755 pharmacological approaches to the role of GABA(A) receptor subtypes.  
756 *Neuropharmacology*. 62(1):54–62. doi:10.1016/j.neuropharm.2011.07.026.
- 757 Treiman DM. 2001. GABAergic mechanisms in epilepsy. *Epilepsia*. 42 Suppl 3:8–12.  
758 doi:10.1046/j.1528-1157.2001.042suppl.3008.x.
- 759 Triller A, Rostaing P, Korn H, Legendre P. 1997. Morphofunctional evidence for mature  
760 synaptic contacts on the Mauthner cell of 52-hour-old zebrafish larvae. *Neuroscience*.  
761 80(1):133–145. doi:10.1016/s0306-4522(97)00092-4.
- 762 Varshney GK, Pei W, LaFave MC, Idol J, Xu L, Gallardo V, Carrington B, Bishop K, Jones  
763 M, Li M, et al. 2015. High-throughput gene targeting and phenotyping in zebrafish using  
764 CRISPR/Cas9. *Genome Res*. 25(7):1030–1042. doi:10.1101/gr.186379.114.
- 765 Vicini S, Ortinski P. 2004. Genetic manipulations of GABAA receptor in mice make  
766 inhibition exciting. *Pharmacol Ther*. 103(2):109–120.  
767 doi:10.1016/j.pharmthera.2004.06.001.
- 768 Walker MC, Kullmann DM. 2012. Tonic GABAA Receptor-Mediated Signaling in Epilepsy.  
769 In: Noebels JL, Avoli M, Rogawski MA, Olsen RW, Delgado-Escueta AV, editors.  
770 *Jasper's Basic Mechanisms of the Epilepsies*. 4th ed. Bethesda (MD)
- 771 Wisden W, Laurie DJ, Monyer H, Seeburg PH. 1992. The distribution of 13 GABAA  
772 receptor subunit mRNAs in the rat brain. I. Telencephalon, diencephalon,  
773 mesencephalon. *J Neurosci Off J Soc Neurosci*. 12(3):1040–1062.
- 774 Wu RS, Lam II, Clay H, Duong DN, Deo RC, Coughlin SR. 2018. A Rapid Method for  
775 Directed Gene Knockout for Screening in G0 Zebrafish. *Dev Cell*. 46(1):112-125.e4.  
776 doi:10.1016/j.devcel.2018.06.003.
- 777 Yang X, Jounaidi Y, Mukherjee K, Fantasia RJ, Liao EC, Yu B, Forman SA. 2019. Drug-  
778 selective Anesthetic Insensitivity of Zebrafish Lacking  $\gamma$ -Aminobutyric Acid Type A  
779 Receptor  $\beta$ 3 Subunits. *Anesthesiology*. 131(6):1276–1291.  
780 doi:10.1097/ALN.0000000000002963.
- 781 Zeller A, Crestani F, Camenisch I, Iwasato T, Itohara S, Fritschy JM, Rudolph U. 2008.  
782 Cortical glutamatergic neurons mediate the motor sedative action of diazepam. *Mol*  
783 *Pharmacol*. 73(2):282–291. doi:10.1124/mol.107.038828.
- 784 Zhou C, Huang Z, Ding L, Deel ME, Arain FM, Murray CR, Patel RS, Flanagan CD,  
785 Gallagher MJ. 2013. Altered cortical GABAA receptor composition, physiology, and  
786 endocytosis in a mouse model of a human genetic absence epilepsy syndrome. *J Biol*  
787 *Chem*. 288(29):21458–21472. doi:10.1074/jbc.M112.444372.
- 788 Zhu S, Noviello CM, Teng J, Walsh RM, Kim JJ, Hibbs RE. 2018. Structure of a human  
789 synaptic GABA A receptor. *Nature*. 559(7712):67–72. doi:10.1038/s41586-018-0255-3.

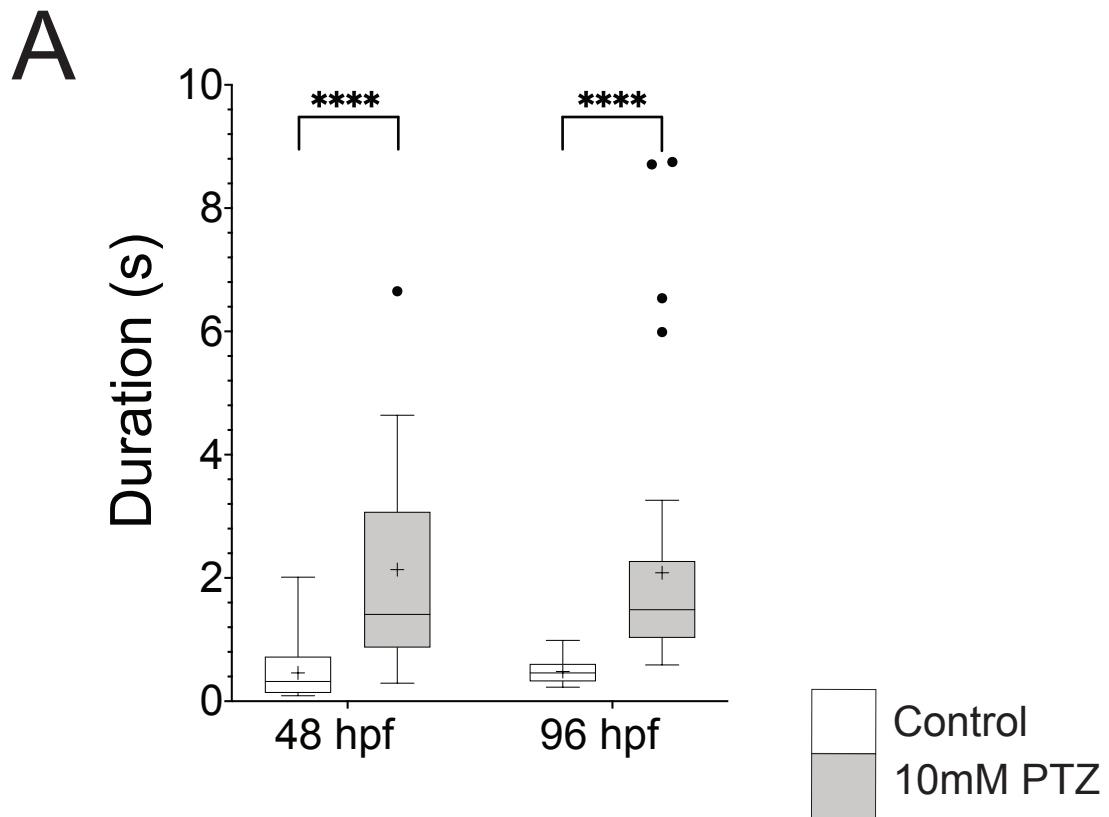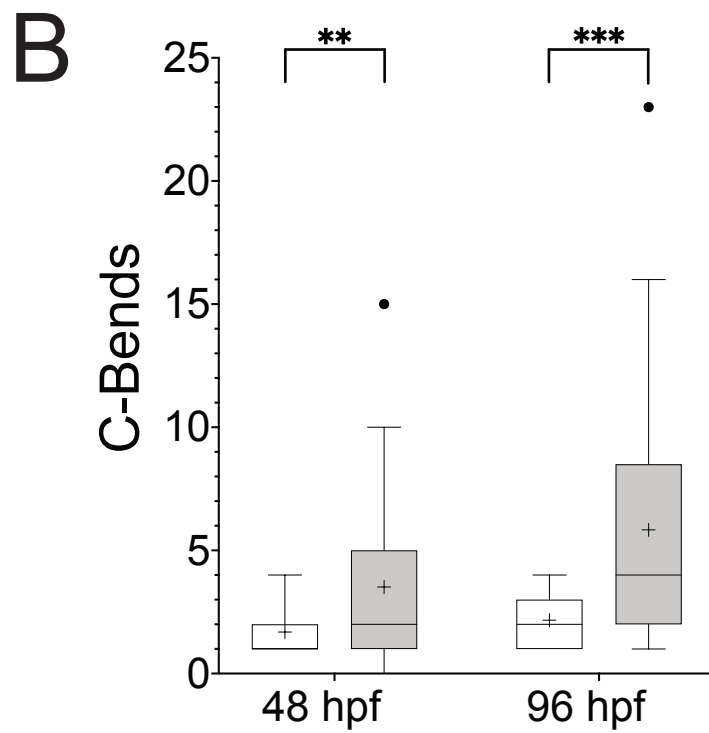

**A**

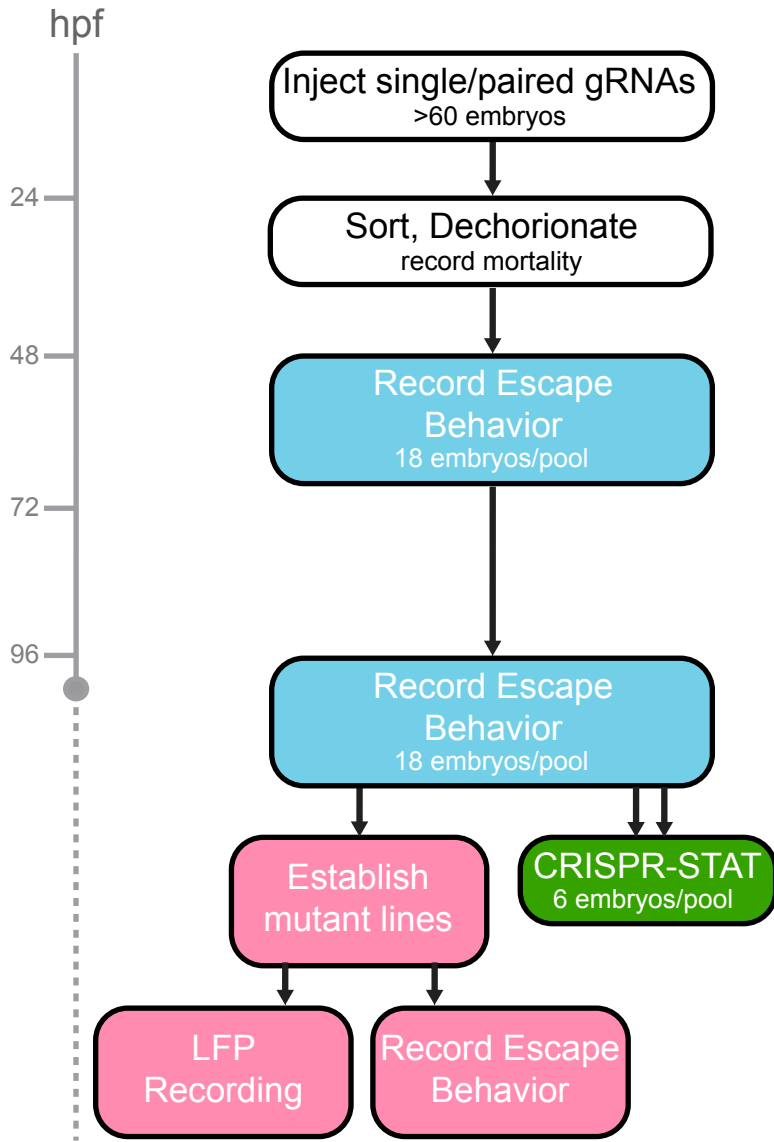

**B**

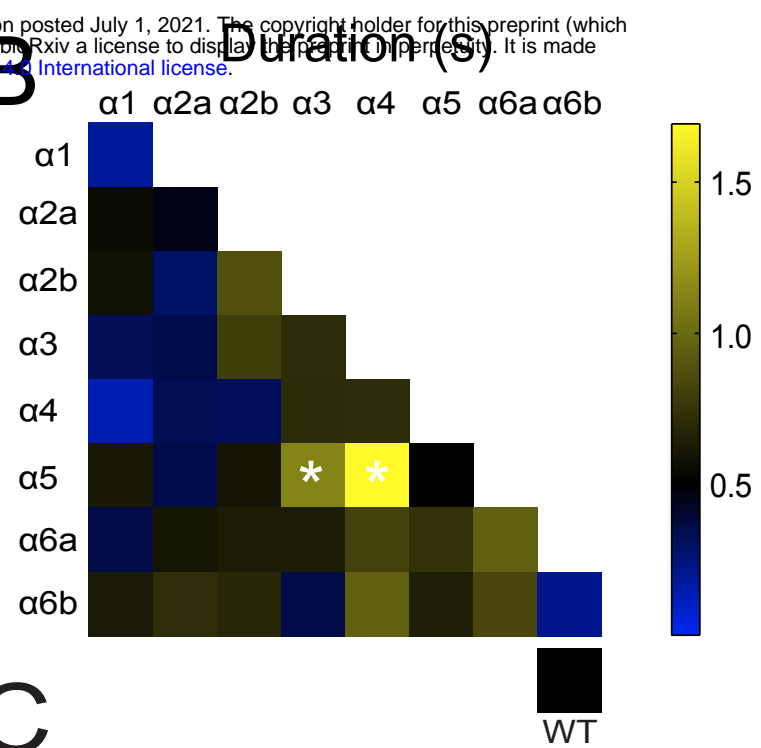

**C**

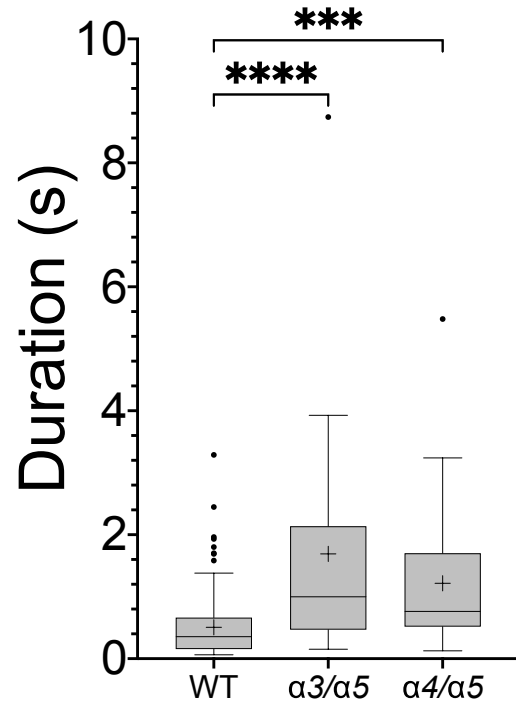

**D**

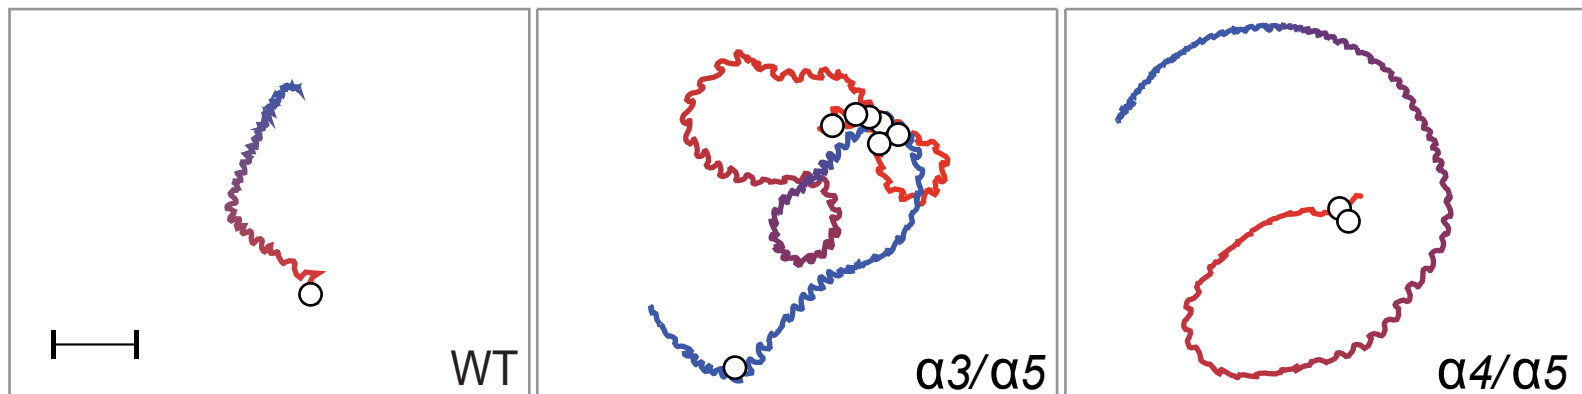



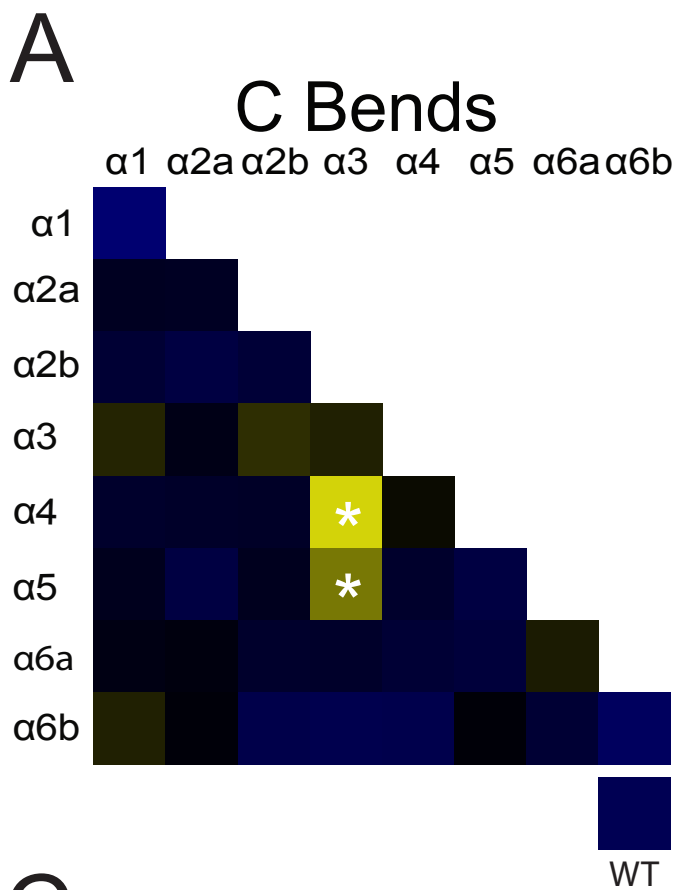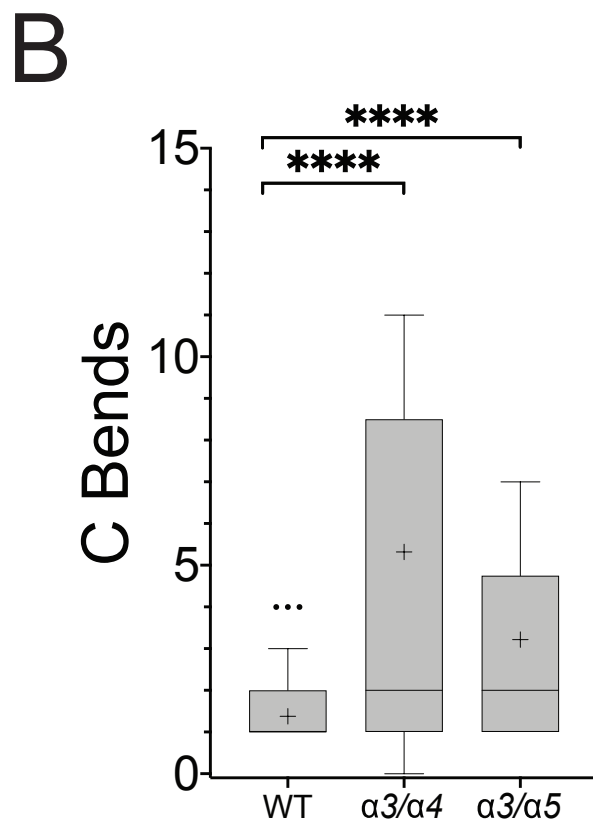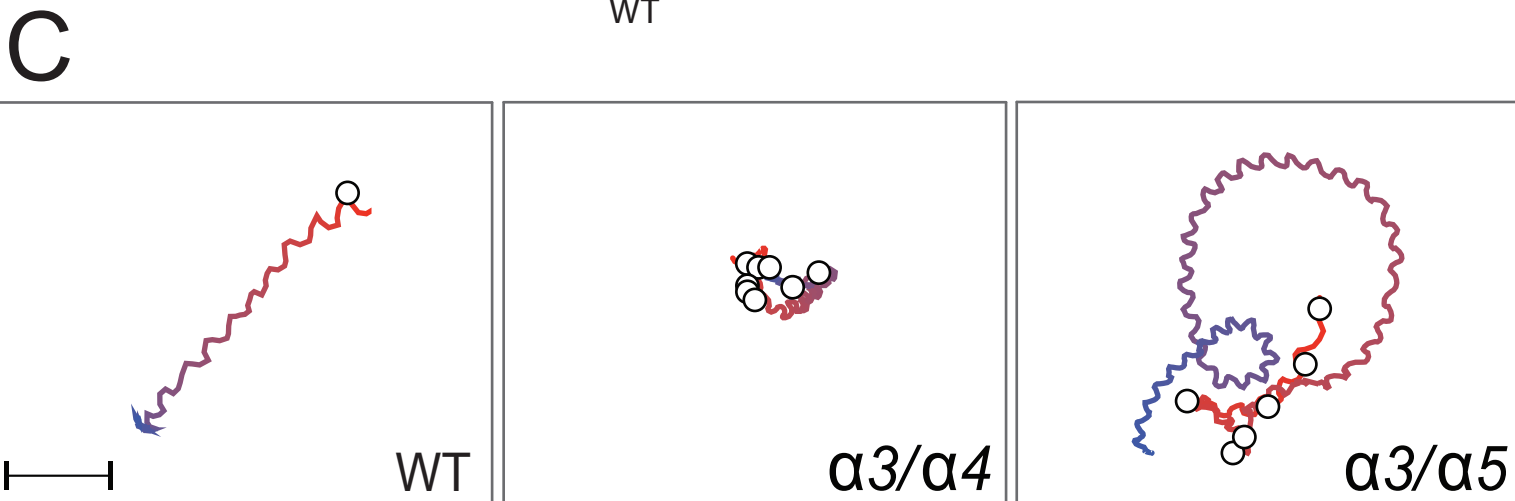

A

Duration (s)

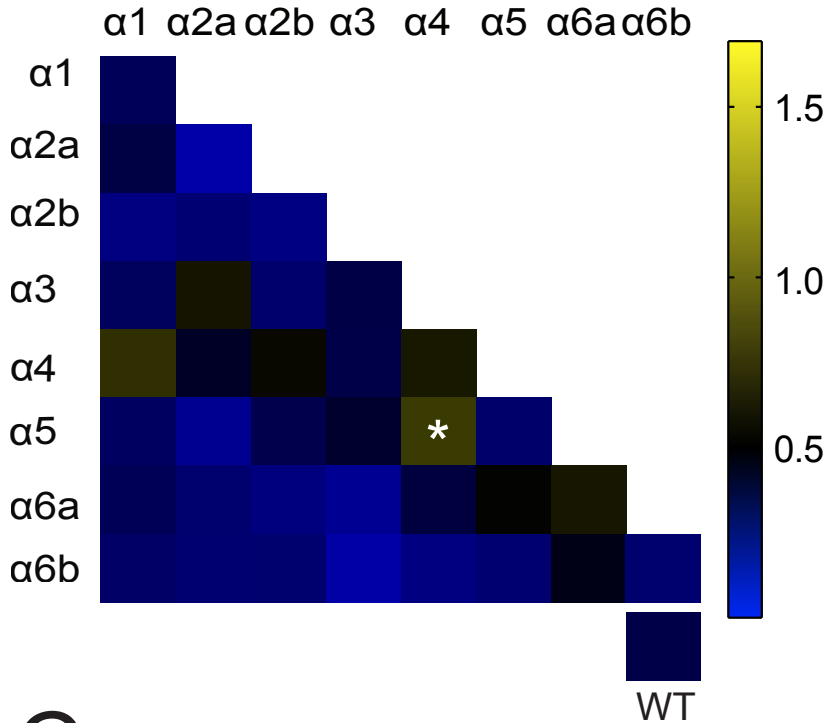

B

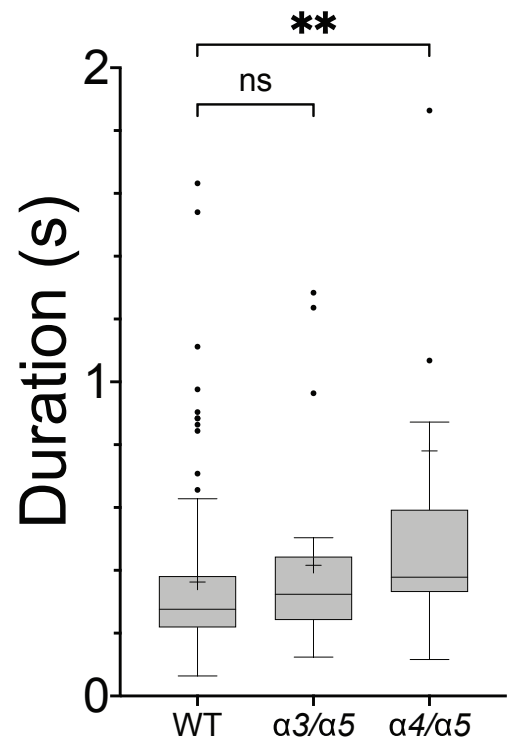

C

C Bends

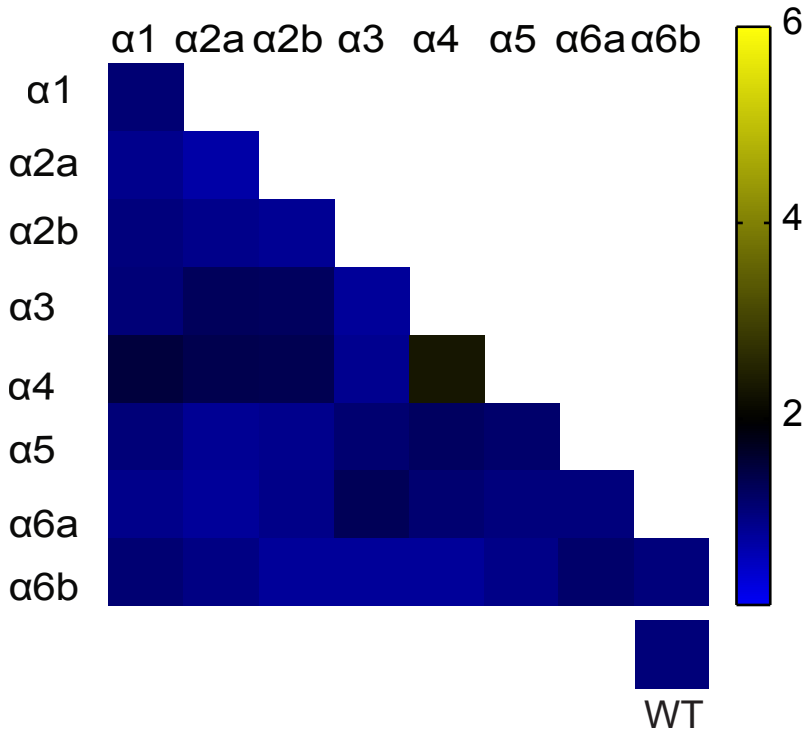

D

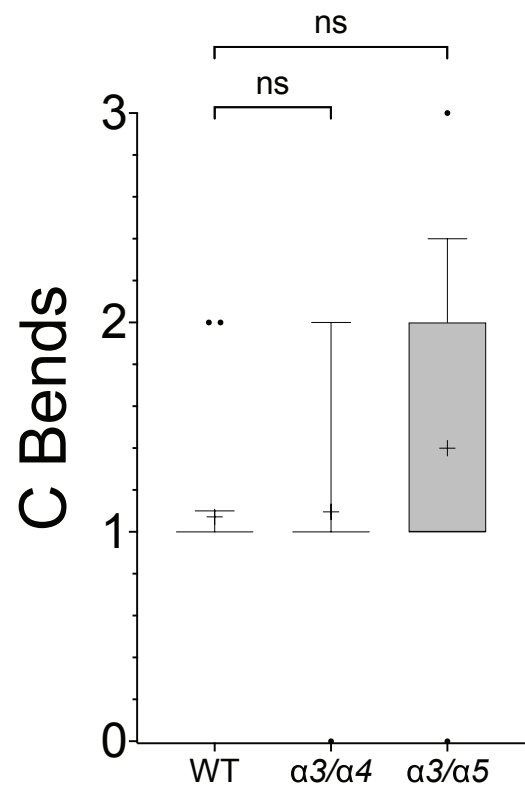

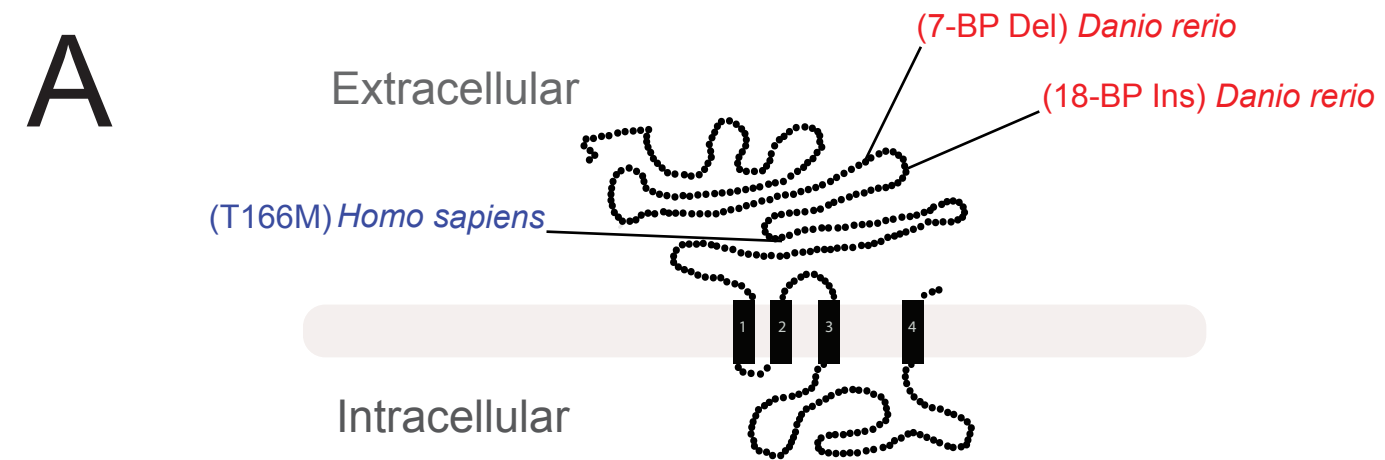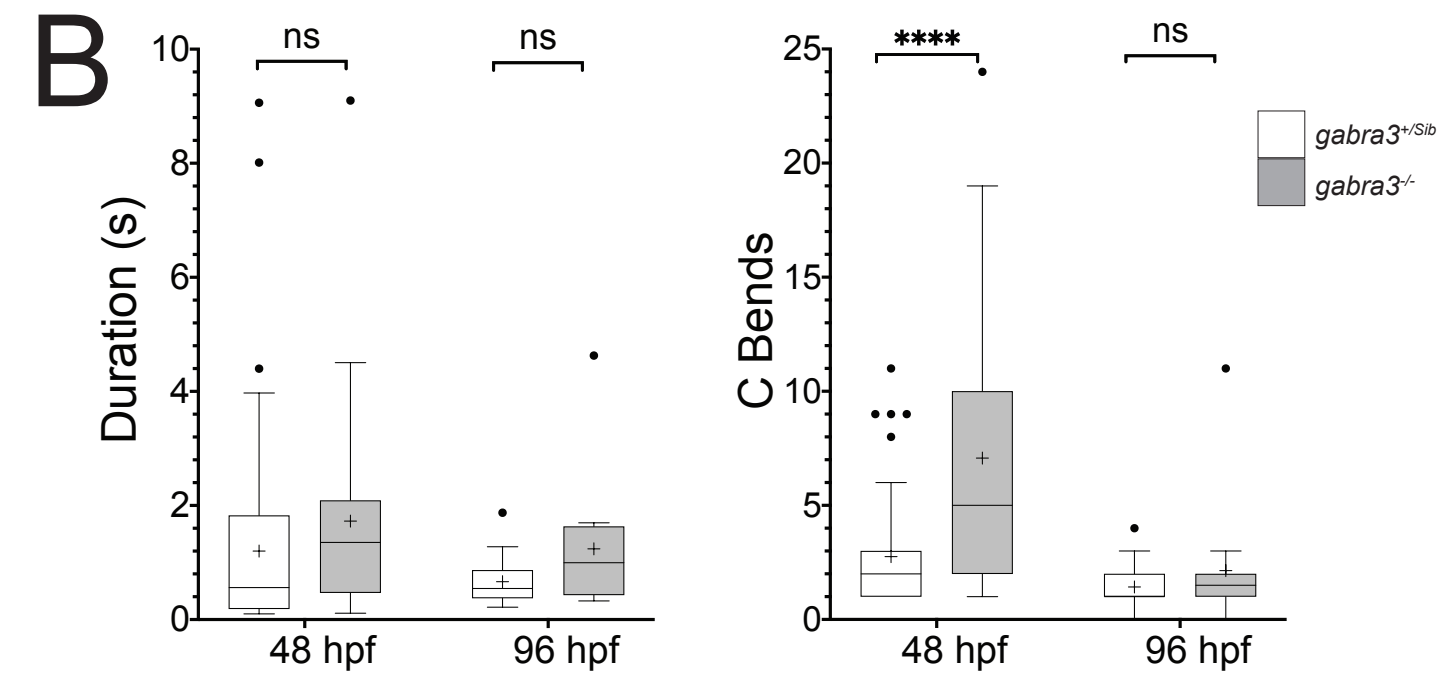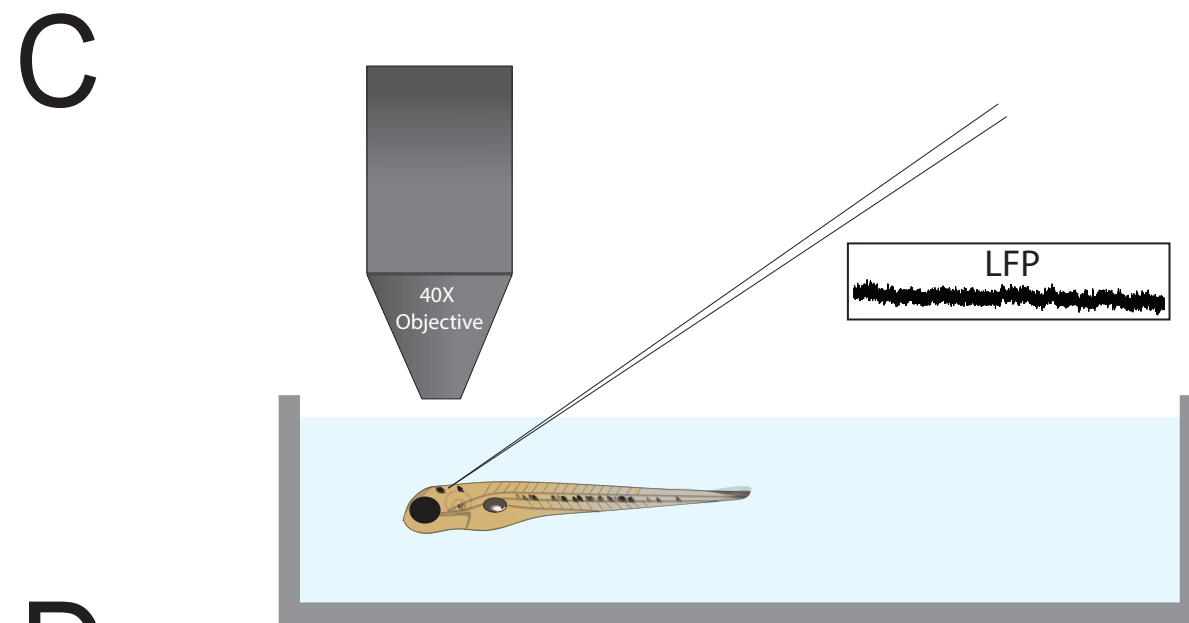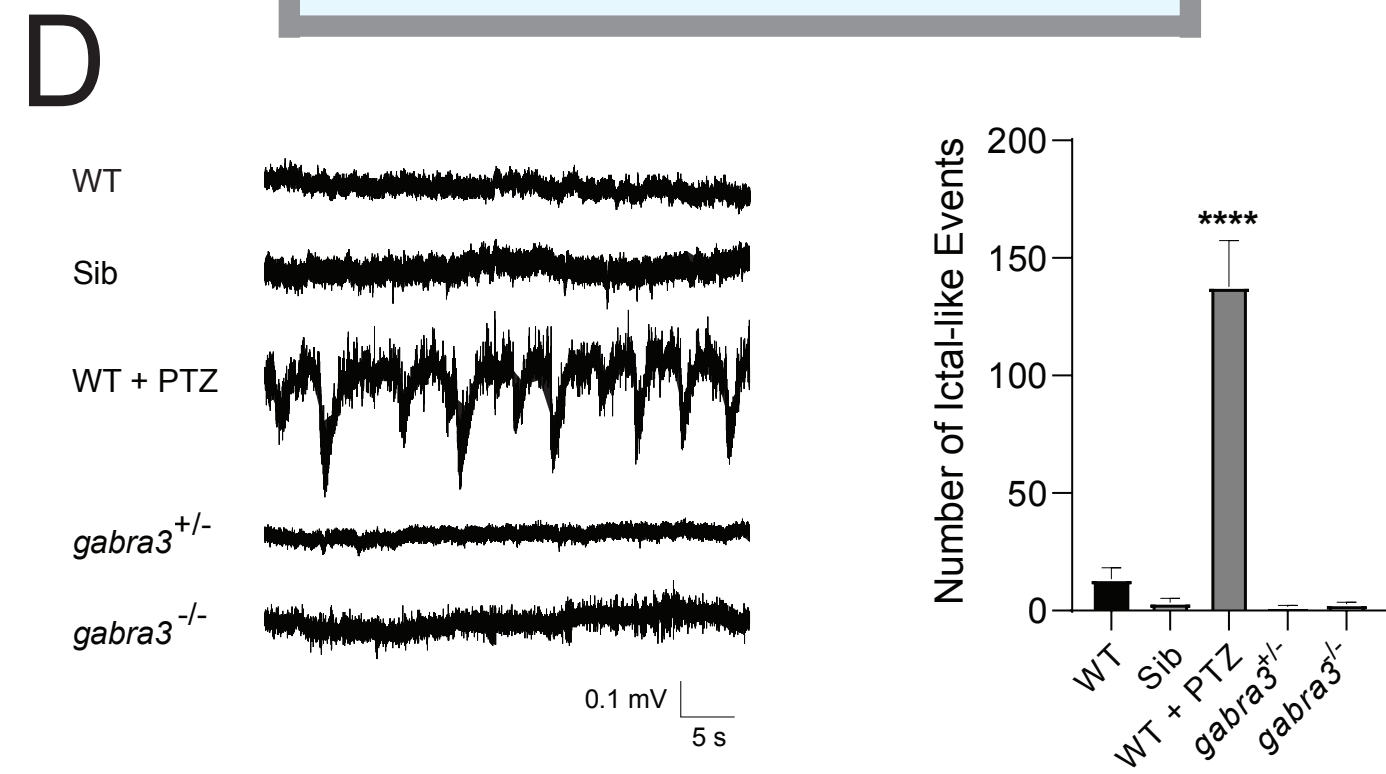

Source: https://www.biorxiv.org/content/biorxiv/early/2021/07/01/2021.07.01.450600.full.pdf
